# Supplementary material for: Effects of remote learning during the COVID-19 lockdown on children’s visual health: a systematic review
Source: PubMed Central journal article supplement — BMJ Open. 2022 Aug 2;12(8):e062388. doi: 10.1136/bmjopen-2022-062388 (PMC9352565; doi:10.1136/bmjopen-2022-062388), 2022-08-02
Supplement: bmjopen-2022-062388.draft_revisions.pdf [file bmjopen-2022-062388.draft_revisions.pdf]

# BMJ Open

BMJ Open is committed to open peer review. As part of this commitment we make the peer review history of every article we publish publicly available.

When an article is published we post the peer reviewers' comments and the authors' responses online. We also post the versions of the paper that were used during peer review. These are the versions that the peer review comments apply to.

The versions of the paper that follow are the versions that were submitted during the peer review process. They are not the versions of record or the final published versions. They should not be cited or distributed as the published version of this manuscript.

BMJ Open is an open access journal and the full, final, typeset and author-corrected version of record of the manuscript is available on our site with no access controls, subscription charges or pay-per-view fees (<http://bmjopen.bmj.com>).

If you have any questions on BMJ Open's open peer review process please email [info.bmjopen@bmj.com](mailto:info.bmjopen@bmj.com)

# BMJ Open

## Effects of remote learning during COVID-19 lockdown on children's visual health: a Systematic Review.

|                               |                                                                                                                                                                                                                                                                                                                                                                                                                                                                                                                                                                                                                                                                                                                                                                                                              |
|-------------------------------|--------------------------------------------------------------------------------------------------------------------------------------------------------------------------------------------------------------------------------------------------------------------------------------------------------------------------------------------------------------------------------------------------------------------------------------------------------------------------------------------------------------------------------------------------------------------------------------------------------------------------------------------------------------------------------------------------------------------------------------------------------------------------------------------------------------|
| Journal:                      | <i>BMJ Open</i>                                                                                                                                                                                                                                                                                                                                                                                                                                                                                                                                                                                                                                                                                                                                                                                              |
| Manuscript ID                 | bmjopen-2022-062388                                                                                                                                                                                                                                                                                                                                                                                                                                                                                                                                                                                                                                                                                                                                                                                          |
| Article Type:                 | Original research                                                                                                                                                                                                                                                                                                                                                                                                                                                                                                                                                                                                                                                                                                                                                                                            |
| Date Submitted by the Author: | 01-Mar-2022                                                                                                                                                                                                                                                                                                                                                                                                                                                                                                                                                                                                                                                                                                                                                                                                  |
| Complete List of Authors:     | <p>Cortés-Albornoz, María ; Universidad del Rosario, Neuroscience Research Group (NEUROS) and Centro Neurovitae, School of Medicine and Health Sciences</p> <p>Ramírez-Guerrero, Sofía; Universidad del Rosario, Neuroscience Research Group (NEUROS) and Centro Neurovitae, School of Medicine and Health Sciences</p> <p>Rojas-Carabali, William; Universidad del Rosario, Neuroscience Research Group (NEUROS) and Centro Neurovitae, School of Medicine and Health Sciences</p> <p>de-la-Torre, Alejandra; Universidad del Rosario, Neuroscience Research Group (NEUROS) and Centro Neurovitae, School of Medicine and Health Sciences</p> <p>Talero-Gutiérrez, Claudia; Universidad del Rosario, Neuroscience Research Group (NEUROS) and Centro Neurovitae, School of Medicine and Health Sciences</p> |
| Keywords:                     | COVID-19, PAEDIATRICS, Paediatric ophthalmology < OPHTHALMOLOGY                                                                                                                                                                                                                                                                                                                                                                                                                                                                                                                                                                                                                                                                                                                                              |
|                               |                                                                                                                                                                                                                                                                                                                                                                                                                                                                                                                                                                                                                                                                                                                                                                                                              |

SCHOLARONE™  
Manuscripts

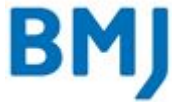

I, the Submitting Author has the right to grant and does grant on behalf of all authors of the Work (as defined in the below author licence), an exclusive licence and/or a non-exclusive licence for contributions from authors who are: i) UK Crown employees; ii) where BMJ has agreed a CC-BY licence shall apply, and/or iii) in accordance with the terms applicable for US Federal Government officers or employees acting as part of their official duties; on a worldwide, perpetual, irrevocable, royalty-free basis to BMJ Publishing Group Ltd ("BMJ") its licensees and where the relevant Journal is co-owned by BMJ to the co-owners of the Journal, to publish the Work in this journal and any other BMJ products and to exploit all rights, as set out in our [licence](#).

The Submitting Author accepts and understands that any supply made under these terms is made by BMJ to the Submitting Author unless you are acting as an employee on behalf of your employer or a postgraduate student of an affiliated institution which is paying any applicable article publishing charge ("APC") for Open Access articles. Where the Submitting Author wishes to make the Work available on an Open Access basis (and intends to pay the relevant APC), the terms of reuse of such Open Access shall be governed by a Creative Commons licence – details of these licences and which [Creative Commons](#) licence will apply to this Work are set out in our licence referred to above.

Other than as permitted in any relevant BMJ Author's Self Archiving Policies, I confirm this Work has not been accepted for publication elsewhere, is not being considered for publication elsewhere and does not duplicate material already published. I confirm all authors consent to publication of this Work and authorise the granting of this licence.

1  
2  
3  
4 **Title:** Effects of remote learning during COVID-19 lockdown on children's visual health: a  
5  
6  
7 Systematic Review.

8  
9  
10 **Authors names:** María C. Cortés-Albornoz<sup>1</sup>, Sofía Ramírez-Guerrero<sup>1</sup>; William Rojas-Carabali<sup>1</sup>;  
11  
12 Alejandra de-la-Torre<sup>1</sup>; Claudia Talero-Gutiérrez<sup>1\*</sup>

13  
14  
15 **Author affiliations:** 1. Neuroscience Research Group (NEUROS) and Centro Neurovitae, School  
16  
17 of Medicine and Health Sciences, Universidad del Rosario, Bogotá.

18  
19  
20  
21 **Corresponding author:** Claudia Talero-Gutiérrez, Kra 24#63C-69. Escuela de Medicina- Quinta  
22  
23 de Mutis (Bogotá, Colombia), +573158959271, [claudia.talero@urosario.edu.co](mailto:claudia.talero@urosario.edu.co)

24  
25  
26  
27 **Author notes:**

28  
29 María C. Cortés-Albornoz, MD.: <https://orcid.org/0000-0003-0733-5105>,  
30 [mariacam.cortes@urosario.edu.co](mailto:mariacam.cortes@urosario.edu.co)

31  
32 Sofía Ramírez-Guerrero: <https://orcid.org/0000-0001-8927-8284>,  
33 [sofia.ramirezg@urosario.edu.co](mailto:sofia.ramirezg@urosario.edu.co)

34  
35 William Rojas-Carabali, MD: <https://orcid.org/0000-0002-9976-8989>, [warcinvest@gmail.com](mailto:warcinvest@gmail.com)

36  
37 Alejandra de-la-Torre, MD., PhD.: <https://orcid.org/0000-0003-0684-1989>,  
38 [alejadelatorre@yahoo.com](mailto:alejadelatorre@yahoo.com)

39  
40  
41  
42 Claudia Talero-Gutiérrez MD.: [orcid.org/0000-0003-1601-5015](https://orcid.org/0000-0003-1601-5015)

**Abstract:**

**Objective:** Increased exposure to digital devices for online classes increases susceptibility to visual impairments, particularly among school students exposed to e-learning strategies. This study aims to identify the impact of remote learning due to COVID-19 lockdown in children's visual health.

**Methods:** A systematic review was conducted using Scopus, PubMed, and ScienceDirect databases. Eligible articles included cross-sectional, case-control, and cohort studies, case series, and case reports, as well as those published in English, Spanish, or French, from the year 2020 onwards. Articles excluded were different study designs, published before 2020, studies focused on the adult population, and those evaluating children with genetic syndromes.

**Results:** A total of 19 articles were included with previous quality assessments following the Joanna Briggs checklist. Risk of bias assessment was applied using the NIH quality assessment tool for before-after studies, the Hoy et al. tool for prevalence studies, the Murad MH et al. tool for case reports/case series, and the Newcastle-Ottawa Scale for cohort studies. Overall, the main ocular effects found were refractive errors, accommodation disturbances, and visual symptoms (dry eye syndrome and asthenopia).

**Conclusion:** Before the pandemic started, there was evidence of the relationship between screen time and visual impairments. However, increased dependence on digital devices for online classes has either induced or exacerbated visual disturbances in children exposed to remote learning during the COVID-19 lockdown.

**PROSPERO registration number** CRD42022307107

1  
2  
3  
4  
5  
6  
7 **Keywords:** COVID-19, lockdown, remote learning, distance education, screen time, vision,  
8 myopia, children.  
9

10  
11  
12  
13  
14  
15 **Key questions:**

16  
17  
18 What is already known on this topic:

19  
20  
21  
22 We searched 3 databases (PubMed, ScienceDirect, and Scopus) for primary research articles  
23 published in French, English, and Spanish between 2000 and 2022. The search followed the key  
24 terms: (vision) OR (visual impairment) OR (myopia [MeSH Terms])) AND (screen time) in areas  
25 such as neuroscience, nursing, health sciences to retrieve evidence before COVID-19 pandemic.  
26  
27 We identified different studies that inquired screen time, video gaming, and internet use with  
28 ocular surface alterations, refractive error progression, visual fatigue, retinal microvasculature  
29 alterations among other visual consequences on children. We highlight one cohort study before  
30 pandemic that found that increased near work and computer use increased the risk of myopia,  
31 while outdoor time showed a protective effect. Myopia incidence and progression are determined  
32 by other environmental and socio-cultural factors linked to lifestyles. In 2021 a retrospective cross-  
33 sectional study from 2016 to 2017 evaluated the association of electronic device use with dry eye  
34 disease in children and found a strong association with severe meibomian gland atrophy. These  
35 studies showed that adaptation of new habits due to the increase in the use of technology could  
36 trigger changes in children's visual health worldwide.  
37  
38  
39  
40  
41  
42  
43  
44  
45  
46  
47  
48  
49  
50  
51  
52  
53

54  
55 What this study adds:  
56  
57  
58  
59  
60

1  
2  
3 To our knowledge, this is the first systematic review that summarizes evidence about the effects  
4 of remote learning during COVID-19 lockdown on children's visual health. We assessed reported  
5 data from more than 1.1 million patients worldwide addressing five clinical conditions, including  
6 esotropia, accommodation disturbances, dry eye, asthenopia, and refractive errors, especially  
7 myopia, a highly prevalent and costly condition. Most studies demonstrate that the lifestyle and  
8 habits changes during the pandemic expose children to risk factors such as high near work time  
9 and low outdoor time, increasing the incidence and prevalence of myopia and triggering new  
10 conditions such as digital eye strain and esotropia.  
11  
12  
13  
14  
15  
16  
17  
18  
19  
20  
21

22 How this study might affect research, practice or policy:  
23  
24  
25

26 This study identified the most prevalent visual abnormalities in children exposed to intense digital  
27 screen time during online classes in the COVID-19 lockdown scenario. The appearance and  
28 worsening of convergence insufficiency, accommodation disturbances, refraction errors, and  
29 asthenopia represents a public health issue in the growing technological era. In accordance with  
30 previous evidence, results obtained from this systematic review highlight the importance of  
31 implementing preventive and therapeutic strategies to delay the appearance or further development  
32 of visual disturbances in children.  
33  
34  
35  
36  
37  
38  
39  
40  
41  
42  
43  
44  
45  
46  
47  
48  
49  
50  
51  
52  
53  
54  
55  
56  
57  
58  
59  
60

## Introduction:

Since the World Health Organization declared a global pandemic in March 2020, COVID-19 has become the focus of governmental decisions to slow down its death toll and ameliorate its consequences. Schools, universities, and businesses have been forced to close to prevent spread, inducing a drastic change from in-person relationships to absolute digital dependence (1). Lifestyle and behavioral modifications that have emerged in response to lockdowns have affected approximately 80% of the world's student population (1).

The establishment of in-house quarantine implied a significant decrease in outdoor activities, less exposure to sunlight, and increased time spent doing near work, which predisposed individuals to visual impairments, especially among school and university students submerged into a digital learning approach (1,2). Growing dependence on e-learning and electronic devices has increased the incidence of visual fatigue, onset and progression of myopia, dry eye syndrome, irregular astigmatism, and acute concomitant esotropia, among other ocular pathologies (3).

Even before the pandemic was declared, it was estimated that by the end of the century, almost 100% of the world's population will have acquired myopia (1). During COVID-19 lockdown, the increasing need for electronic devices, digital screens, and virtual classrooms have caused previously healthy students to develop myopia, and those who already had it faced a rapid progression. Obligatory confinement, intensive near-work activities, and lower sunlight exposure lead to visual fatigue and, eventually, myopia, the most prevalent ocular impairment (3).



1  
2  
3 On the other hand, digital screen use is considered a common risk factor of dry eye syndrome  
4 (DED), characterized by the deterioration of tear film quality, which can be exacerbated by longer  
5 digital screen time (4,5). The longer the screen time, the higher the risk and the more severe the  
6 symptoms (6). Myopia and dry eye syndrome are a few examples of the consequences in visual  
7 health caused by the increasing demand on e-learning approaches to which children have been  
8 exposed from a very young age. Therefore, this systematic review aims to identify the impact of  
9 remote learning due to COVID-19 lockdown in children's visual health.  
10  
11  
12  
13  
14  
15  
16  
17  
18  
19  
20

## 21 **Methods**

### 22 **Search strategy and selection criteria**

23  
24  
25 In January of 2022 a Systematic review was conducted using three online databases. The following  
26 terms were used in PubMed (<https://pubmed.ncbi.nlm.nih.gov/advanced/>) (((((vision) OR (visual  
27 impairment)) OR (myopia[MeSH Terms])) AND (COVID-19)) AND (lockdown)) AND (screen  
28 time). In Science direct database (<https://www.sciencedirect.com/search>) ((vision)OR (visual  
29 impairment) OR (myopia)) AND ((Covid-19 lockdown)) AND (screen time)). Finally in Scopus  
30 database (<https://www.scopus.com>) we used ALL ( vision OR ( "visual" AND "impairment" )  
31 OR myopia AND ( "Covid-19" AND "lockdown" ) AND ( "screen" AND "time" ) ) AND ( )  
32 LIMIT-TO ( SUBJAREA , "MEDI" ) OR LIMIT-TO ( SUBJAREA , "COMP" ) OR LIMIT-  
33 TO ( SUBJAREA , "NEUR" ) OR LIMIT-TO ( SUBJAREA , "NURS" ) OR LIMIT-TO ( )  
34 SUBJAREA , "HEAL" ) ) . The ID CRD42022307107 was generated in the International  
35 prospective register of systematic reviews PROSPERO.  
36  
37  
38  
39  
40  
41  
42  
43  
44  
45  
46  
47  
48  
49  
50  
51  
52

### 53 **Data collection**

1  
2  
3 A total of 324 articles were retrieved, duplicates were removed, and the remaining articles were  
4 filtered by title and abstract following the Preferred Reporting Items for Systemic Reviews and  
5 Meta-Analyses guidelines (figure 1 and Supplementary table 1). Five researchers divided into two  
6  
7  
8  
9  
10  
11  
12  
13  
14  
15  
16  
17  
18  
19  
20  
21  
22  
23  
24  
25  
26  
27  
28  
29  
30  
31  
32  
33  
34  
35  
36  
37  
38  
39  
40  
41  
42  
43  
44  
45  
46  
47  
48  
49  
50  
51  
52  
53  
54  
55  
56  
57  
58  
59  
60

A total of 324 articles were retrieved, duplicates were removed, and the remaining articles were filtered by title and abstract following the Preferred Reporting Items for Systemic Reviews and Meta-Analyses guidelines (figure 1 and Supplementary table 1). Five researchers divided into two groups screened all articles, and 26 articles were selected. At weekly meetings, authors analyzed studies, debated disagreements, and double-checked all articles following inclusion and exclusion criteria. Articles were included if they studied the effects of remote learning during COVID-19 lockdown on neurotypical children's visual health. And excluded if they (I) were published before 2020; (II) studied the effects of remote learning during COVID-19 lockdown on adult or university students' visual health; (III) participants were children with genetic syndromes or visual disability; (IV) were book chapters, editorial or opinion texts; (V) were published in languages other than Spanish, English, and French. A total of 19 articles were included and evaluated with Joanna Briggs's checklist to guarantee their quality. Additionally, risk of bias assessment was applied using The National Institutes of Health (NIH) quality assessment tool for before-after (Pre-Post) studies with no control group (7), the Hoy et al. proposed tool (8,9), the Tool for evaluating the methodological quality of case reports and case series proposed by Murad MH et al. (10) and the Newcastle-Ottawa Scale for cohort studies (7). All domains were evaluated in the tools (Supplementary table 2).

Finally, data were extracted to obtain the following information: title, authors, digital object identifier number, objective, type of study, country of the study, population (age and sample), presence of control group (age and sample), implemented test or evaluation methodology, main visual outcome, results, conclusion, and a final question: is there an effect of COVID-19 lockdown on visual health? Visual health improves, worsens, or remains the same?. All information was synthesized using qualitative and quantitative synthesis (results column). Considering the

heterogeneity among studies, we create subgroups of analysis to cluster findings, for example, studies regarding dry eye disease, refractive errors, clinical symptoms, among others. All investigators participated in the data collection and synthesis.

### **Patient and public involvement:**

This research was done without patient or public involvement. However, the findings will be shared in conferences with pediatric ophthalmologists and myopic patients who attend ophthalmological services.

### **Results**

Articles included in the review were grouped based on the main visual outcome associated with children's vision status and progression during COVID-19 lockdown. Overall, the main ocular effects found were refractive errors (myopia), accommodation disturbances (esotropia), and visual symptoms (dry eye and fatigue) (**Table 1**). Among all studies, 14 were conducted in Asia (11-24), 2 in Europe (25,26), and 3 in America (27-29). After the risk of bias assessment, we found that all the cross-sectional studies presented a low risk of bias. The unique case series had a low risk of bias. Three of the before-and-after studies had a fair quality, and one had good quality.

**Table 1: Articles related to visual outcomes and the impact of remote learning during COVID-19.**

| <b>Ocular outcome</b> |        | <b>Reference</b>     |
|-----------------------|--------|----------------------|
| Refractive errors     | Myopia | (13,15,17–22,26,28,) |

|                       |                            |               |
|-----------------------|----------------------------|---------------|
| Vergence disturbances | Accommodation disturbances | (11,29)       |
|                       | Esotropia                  | (25)          |
| Visual symptoms       | Dry eye                    | (16,24)       |
|                       | Asthenopia                 | (12,14,23,29) |

We found 10 articles regarding refractive errors related to virtual learning during COVID -19 lockdown. Most of them studied myopia progression as the main visual outcome. Seven studies evidenced that myopia worsened throughout COVID-19 lockdown in children and teenagers between 5 to 18 years old (13,15,17,18,20–22). One study showed a significant decrease in spherical equivalent refraction (SER) in children with hyperopia and emmetropia (26). Interestingly, a study evaluating axial length in myopic children undergoing orthokeratology did not find any change in myopia progression during lockdown (19). Furthermore, one study focused on children's risk factors and behavioral changes due to COVID-19 lockdown and its relationship with myopia found that all children had changes in near-work time, electronic device use, and outdoor time. However, myopic children had a significantly lower daily light exposure than non-myopic (28). Monthly myopia progression during COVID-19 lockdown was reported to be  $-0.074$  D/month, which correlates to an annual progression in 2020 of  $-0.71 \pm 0.46$  D (13,18). SER was estimated in several studies. In 2020, the mean SER in myopic children and teenagers was between  $-1.94 \pm 2.13$  D and  $-2.7 \pm 1.21$  D being significantly lower than in 2019 ( $-1.64 \pm 5.49$  D and  $-1.99 \pm 1.04$  D,  $p < 0.001$ ) (17,18). In the same way, a significant decrease in the mean SER of hyperopic and emmetrope children was found in 2019 and 2020 to be  $0.66 \pm 2.03$  D (2019) and  $0.48 \pm 1.81$  D (2020) with a  $p \leq 0.001$  (26). Finally, studies comparing virtual learning during

1  
2  
3 COVID-19 lockdown as an exposure risk factor found a higher incidence of myopia in exposed  
4 children ( $p < 0.01$ ) (20-22).  
5  
6  
7  
8  
9

10 Additionally, three studies reported accommodation and vergence dysfunction secondary to near  
11 work and increased screen-use time (11,25,29). Two studies focused on binocular accommodation  
12 in a total of 156 children, from 10 to 17 years old, reported a significant increase in the  
13 Convergence Insufficiency Symptom Survey (CISS) after exposure to longer screen time during  
14 online classes (11,25,29). The other study reported 4 cases of children with acquired concomitant  
15 esotropia and vergence abnormalities secondary to excessive use of digital devices (11,25,29).  
16  
17  
18  
19  
20  
21  
22  
23  
24  
25

26 On the other hand, emerging visual symptoms were identified in six studies whose population  
27 ranged from 8 to 20 years old. They all reported worsening of visual symptoms such as impaired  
28 vision, asthenopia, dryness, scratchiness, headache, eye redness, eye strain, and light sensitivity,  
29 among others (12,14,16,23,24,29).  
30  
31  
32  
33  
34  
35  
36  
37

38 Overall results based on qualitative data synthesis showed a negative effect of COVID-19  
39 lockdown on visual health in children. Only one of the articles included did not show a deleterious  
40 impact on visual impairment (19).  
41  
42  
43  
44

## 45 **Discussion**

### 46 **Refractive errors:**

47  
48  
49 COVID-19 lockdown impacted children and teenagers' behavior and daily life, resulting in  
50 increased digital time, near work, and decreased outdoor time (30). It is estimated that close to  
51  
52  
53  
54  
55  
56  
57  
58  
59  
60

1  
2  
3 1.37 billion students worldwide have changed to a digital or e-learning school modality (30). These  
4 factors have been related to myopia incidence and progression (30). First, the relationship between  
5 near work, especially near reading, and myopia has been well studied even before the pandemic,  
6 as stated in The Collaborative Longitudinal Evaluation of Ethnicity and Refractive Error  
7 Study(30,31). Second, several studies have focused on screen time and its association with myopia  
8 development (30,32,33). Third, outdoor time has been considered a protective factor against  
9 myopia onset. He et al. showed a 23% reduction in myopia incidence after 40 minutes of outdoor  
10 time (30,34).  
11  
12  
13  
14  
15  
16  
17  
18  
19  
20  
21  
22  
23

24 During COVID-19, Mirhajianmoghadam et al. assessed subjective and objective measures in 14  
25 myopic and 39 non-myopic children in the USA during 2020 (28). Initially, parents completed the  
26 University of Houston Near Work, Environment, Activity, and Refraction survey in three sessions.  
27 The first session corresponded to questions related to summer 2020, while the COVID-19  
28 pandemic. The second session was regarded as a typical school period before COVID-19, and a  
29 third session corresponded to a typical summer period before COVID-19. Later, an actigraph  
30 device measured children's physical activity, sleep, and ambient illumination (time spent outdoors)  
31 for 10 days. Results showed that all children had less time outdoors during COVID-19 summer  
32 than before lockdown summers and an increase in daily electronic device use. Furthermore,  
33 myopic children had less daily light exposure ( $183.6 \pm 39.3$  lux) and less time outdoors (0.2 hours  
34 per day) during COVID-19 compared to non-myopic children ( $279.5 \pm 23.5$  lux,  $P = 0.04$ )(28).  
35  
36  
37  
38  
39  
40  
41  
42  
43  
44  
45  
46  
47  
48  
49  
50

51 Some previous studies have proposed that increased digital use time is associated with decreased  
52 time spent outdoors and retina impaired dopamine release, normally stimulated by daylight  
53  
54  
55  
56  
57  
58  
59  
60

1  
2  
3 exposure. This suppresses axial expansion of the eye, preventing myopia progression (35,36). For  
4  
5 example, Wu et al. reported that children who spent more than 11 hours a week outdoors had a  
6  
7 53% decrease in myopia progression (37). And Ip et al. reported an increased incidence of  
8  
9 progression in children living in apartment buildings compared to those living in detached houses  
10  
11 (38). And Xu et al. found that students' online time was significantly positively associated with  
12  
13 increased myopia incidence and progression (21). However, other studies have not shown this  
14  
15 correlation (18). Aslan et al. reported that myopia advancement in 2020 was mainly slow  
16  
17 ( $0.31 \pm 0.2$  D) in most of the children evaluated (49 subjects), followed by moderate proression  
18  
19 on 45 children ( $0.82 \pm 0.14$  D). However, this study found no correlation with digital time use or  
20  
21 glasses use (18). Yet, myopia progression and digital time use relationship are still under  
22  
23 investigation.  
24  
25  
26  
27  
28  
29  
30

31 Moreover, Mirhajianmoghadam et al. and Aslan et al.'s results supported findings that evaluated  
32  
33 myopia progression due to the COVID-19 lockdown. For example, Chang et al. compared myopic  
34  
35 progression before, during, and after COVID-19 lockdown in a 44,187-student population in  
36  
37 China, assessing the non-cycloplegic autorefraction and the SER (13). Four evaluation rounds  
38  
39 separated by 6 months during 2019 and 2020 indicated a transitory accelerated myopic progression  
40  
41 in children that reversed after lockdown. Mean SER during pre-pandemic was  $-0.030$  D/month,  
42  
43 later during lockdown mean SER was  $-0.074$  D/month and during post COVID 19 lockdown, was  
44  
45  $0.016$  D/month, accordingly to a myopic proportion of 48% (before lockdown), 45.2% (before  
46  
47 lockdown) , 73.7% (shortly after lockdown) and 67.9% (after lockdown) during round 1, 2, 3 and  
48  
49 4 respectively. Authors considered accommodative spasms and structural changes related to  
50  
51 restricted outdoor time, increased screen time, and limited indoor space as the leading causes of  
52  
53  
54  
55  
56  
57  
58  
59  
60

1  
2  
3 the progression. Moreover, younger children were at a higher risk of myopic progression during  
4 lockdown due to more pronounced lifestyle changes related to less light exposure and dopamine  
5 levels (13).  
6  
7  
8  
9

10  
11  
12 This matches with Wang et al., who reported a substantial decrease in the SER, especially for  
13 children aged 6 ( $-0.32$  D), 7 ( $-0.28$  D), and 8 ( $-0.29$  D) years, p-value:  $<0.05$  (15). With an earlier  
14 development of myopia in girls. The prevalence of myopia appeared to be approximately 3 times  
15 higher in 2020 than in other years for children aged 6 years, 2 times higher for children aged 7  
16 years, and 1.4 times higher for those aged 8 years. That leads to the hypothesis that younger  
17 children are more sensitive to environmental changes than older (15). Furthermore, Wang et al.  
18 reported a prevalence of Myopia of 39.27% in primary school students, 73.39% in junior school,  
19 and 84.89% in high school students, identifying a 2020 increase rate of myopia among teenagers  
20 (55.02%) compared to 2019 (44.64%) (17).  
21  
22  
23  
24  
25  
26  
27  
28  
29  
30  
31  
32  
33  
34

35 Interestingly, Lv et al. investigated the potential impacts of home confinement on myopia  
36 progression from the perspective of axial length growth in children applying orthokeratology  
37 treatment (19). They found a monthly axial length growth of  $0.023 \pm 0.019$  mm/month,  $0.018 \pm$   
38  $0.021$  mm/month, and  $0.014 \pm 0.016$  mm/month before, during and after home confinement,  
39 respectively. However, the monthly axial length growth after and before confinement was not  
40 significantly different ( $P = 0.333$ ), while age was negatively associated with the axial length  
41 growth rate during confinement in myopic children (19). This coincides with the findings of a  
42 previous meta-analysis that suggested that orthokeratology decreased the rate of myopia  
43 progression in children (39).  
44  
45  
46  
47  
48  
49  
50  
51  
52  
53  
54  
55  
56  
57  
58  
59  
60



1  
2  
3  
4  
5  
6  
7  
8  
9  
10  
11  
12  
13  
14  
15  
16  
17  
18  
19  
20  
21  
22  
23  
24  
25  
26  
27  
28  
29  
30  
31  
32  
33  
34  
35  
36  
37  
38  
39  
40  
41  
42  
43  
44  
45  
46  
47  
48  
49  
50  
51  
52  
53  
54  
55  
56  
57  
58  
59  
60

Conversely, Alvarez-Peregrina et al. did not find an increase in the prevalence of myopic children between 2019 and 2020 (26). However, they encountered that the percentage of hyperopes decreased, and the percentage of emmetropes increased ( $p < 0.001$ ). The average SE value in 2019 was  $+0.66 \pm 2.03$  D, compared to  $+0.48 \pm 1.81$  D in 2020 ( $p \leq 0.001$ ). This decrease was significant in children of 5 years old. Additionally, 47% (CI 95%: 45–50) of children decreased the amount of time spent outdoors ( $p < 0.001$ ). Children who spent more time outdoors had higher SE in both cases: pre and post confinement ( $p < 0.001$  and  $p = 0.049$ ) (26). Even though Alvarez-Peregrina et al.'s results did not demonstrate a myopia progression, it is concerning to identify that the reduction of SER is a strong predictor factor of myopia in emmetropes and hyperopes children, as analyzed in WePrOM study (40).

#### **Accommodation and vergence disturbances:**

The longer duration of digital device use, the more accommodative effort is required, and consequently, increasing asthenopia symptoms and accommodation and vergence dysfunction. Mohan et al. studied the effects of online classes during the COVID-19 pandemic, considering the time spent during online classes and other digital devices such as TV, video games, and smartphones. They evidenced that 36 out of 46 children were symptomatic for convergence insufficiency, according to the CISS survey, followed by an optometrist's and pediatric ophthalmologist's evaluation. However, children exposed to classes of less than 4 hours/day registered fewer symptoms than those who attended online classes for more than 4 hours every day. Furthermore, near exophoria, near point convergence, positive fusional weakness, and accommodation excess were also reported higher in children exposed to longer online classes (11).

1  
2  
3 Similarly, Hamburger et al. evaluated ocular symptoms in 110 children who attended virtual school  
4 during the COVID-19 pandemic and found out 61% of the children reported a significant increase  
5  
6 in convergence insufficiency as evidenced by a higher CISS score after online classes (29).  
7  
8

9  
10  
11 On the other hand, Vagge et al. reported four cases of children between 4 and 16 years old who  
12 developed acute acquired concomitant esotropia after intense digital device use during the  
13 COVID-19 lockdown (25). All of them experienced acute onset of diplopia after more than 8 hours  
14 a day spent on digital screens. The ophthalmologic examination reported manifest esotropia from  
15 20 to 35 prism diopters (PD) at far and near distances in all four patients. Two out of the four  
16 presented bilaterally cycloplegic refraction of +1.00 to +2.00 diopter sphere. One of them  
17 presented cycloplegic refraction of -2.50 in the right eye and -2.25 in the left eye, and one of the  
18 four presented -0.5 bilaterally (25). Some studies suggest that digital-induced esotropia can be  
19 associated with excessive application of near vision, as well as a dynamic activation of medial  
20 rectus muscles when exposed to longer periods of digital screen time that affect the near vision  
21 triad [accommodation-convergence reflex: convergence of both eyes, contraction of the ciliary  
22 muscle resulting in a change of lens shape (accommodation), and pupillary constriction (25,41,42).  
23  
24  
25  
26  
27  
28  
29  
30  
31  
32  
33  
34  
35  
36  
37  
38

### 39 **Visual symptoms**

40  
41  
42 COVID-19 lockdown and remote learning has increased digital device use and consequently has  
43 precipitated a rise in dry eye symptoms and asthenopia. Hamburger et al. reported a significant  
44 increase in asthenopia symptoms before and after online classes with predominating symptoms  
45 such as discomfort, fatigue, and impaired vision. Moreover, an increased asthenopia score was  
46 identified in more than half of the children evaluated (29). Likewise, Li et al. identified a positive  
47 association between screen time and risk of asthenopia in approximately 25,000 students from 8  
48  
49  
50  
51  
52  
53  
54  
55  
56  
57  
58  
59  
60

1  
2  
3 to 20 years old, attributing higher risks of asthenopia to conditions such as myopia, astigmatism,  
4 and mechanical factors like greater distance from the screen (23).  
5  
6

7  
8 Elhusseiny et al. reported a significant increase in symptoms such as dryness, grittiness, and  
9 scratchiness associated with prolonged exposure to digital screens for education and leisure  
10 purposes in 403 children between 10 to 18 years (16). Similarly, Mohan et al. identified longer  
11 screen time during COVID-19 lockdown compared to pre-COVID era in 217 children, of which  
12 almost half attended online classes (12). Specifically, more than a third of the children evaluated  
13 used digital devices for over 5 hours a day, and 50.23% manifested dry eye syndrome with itching  
14 and headache as the most predominant symptoms.  
15  
16  
17  
18  
19  
20  
21  
22  
23

24  
25 Gupta et al. evaluated 654 students between 5 to 18 years old using the Rasch-based Computer-  
26 Vision Symptom Scale (14). The authors reported a significant increase in average digital device  
27 exposure, more frequently smartphone use for more than 5 hours/day. Also, children's visual  
28 symptoms were eye redness, eye strain, blurred vision, light sensitivity, and heaviness of eyelids  
29 (14). Furthermore, Li et al. identified a higher risk of computer vision syndrome in children with  
30 myopia with and without correction, presence of astigmatism, fewer outdoor activities, and  
31 prolonged screen time (24).  
32  
33  
34  
35  
36  
37  
38  
39  
40  
41  
42

43 The relationship between digital screen time and dry eye syndrome had already been described in  
44 both adults and children, even before the COVID-19 global pandemic (43–46). Changes in  
45 blinking dynamics and ocular surface abnormalities are some of the consequences that arise from  
46 intense screen time exposure. Regarding ocular surface measures, longer screen time can decrease  
47 blinking frequency and completeness, resulting in reduced tear break-up time and tear volume, as  
48 well as changes in tear lipid composition (4,47). This means that the longer the exposure to digital  
49  
50  
51  
52  
53  
54  
55  
56  
57  
58  
59  
60

1  
2  
3 devices, the more deterioration of tear film quality, and the higher the risk of developing dry eye  
4 symptoms (4).  
5  
6

### 7 8 9 **Conclusions:**

10  
11  
12 The changes in habits and lifestyles worldwide derived from the COVID-19 pandemic have  
13 severely impacted children's eye health. Ophthalmologists must know the effect that virtual  
14 learning has had on the pediatric population to identify and treat these diseases early. In addition,  
15 countries around the world must implement public health strategies to mitigate these impacts,  
16 especially in diseases as common and costly as myopia. Additionally, further studies are required  
17 to evaluate the long-term impact generated by the health conditions that started during the  
18 pandemic and could have a chronic course.  
19  
20  
21  
22  
23  
24  
25  
26  
27

### 28 29 **Contribution**

30  
31  
32 Conceptualization, M.C.C.-A., S.R-G., W.A.R-C., A.d.-l.-T and C.T.-G.; methodology, M.C.C.-  
33 A., S.R-G., W.A.R-C, and C.T.-G.; investigation M.C.C.-A., S.R-G., W.A.R-C., A.d.-l.-T and  
34 C.T.-G; resources, M.C.C.-A., S.R-G., W.A.R-C., A.d.-l.-T and C.T.-G; data curation, M.C.C.-A.,  
35 S.R-G., and C.T.-G.; writing—original draft preparation M.C.C.-A., S.R-G., W.A.R-C., A.d.-l.-T  
36 and C.T.-G.; writing—review and editing M.C.C.-A., S.R-G., W.A.R-C., A.d.-l.-T and C.T.-G.;  
37 supervision, A.d.-l.-T and C.T.-G. All authors have read and agreed to the published version of  
38 the manuscript  
39  
40  
41  
42  
43  
44  
45  
46  
47  
48

### 49 **Acknowledgments:**

50  
51 The review was supported by the Universidad del Rosario. The sponsors had no role in the design,  
52 data collection, or analysis of the study  
53  
54  
55  
56  
57  
58  
59  
60

**Competing interests:** The authors declare that they have no competing interests

**Funding:** None

**Patient consent for publication:** Not required

**Ethics approval:** No ethical approval was needed

**Data availability statement:** Data collected from this study is available for sharing. Extraction data is available by request to the corresponding article.

## References:

1. Díaz Llopis M, Cisneros Lanuza A. Myopia, the challenge of Ophthalmology and its worldwide "explosive epidemic." *Arch Soc Esp Oftalmol*. 2018 Aug;93(8):365–7.
2. Enthoven CA, Tideman JWL, Polling JR, Yang-Huang J, Raat H, Klaver CCW. The impact of computer use on myopia development in childhood: The Generation R study. *Prev Med*. 2020 Mar;132:105988.
3. Fan Q, Wang H, Kong W, Zhang W, Li Z, Wang Y. Online Learning-Related Visual Function Impairment During and After the COVID-19 Pandemic. *Front Public Health*. 2021 Nov 29;9:645971.
4. Al-Mohtaseb Z, Schachter S, Shen Lee B, Garlich J, Trattler W. The Relationship Between Dry Eye Disease and Digital Screen Use. *Clin Ophthalmol*. 2021 Sep 10;15:3811–20.
5. Napoli PE, Nioi M, Fossarello M. The “Quarantine Dry Eye”: The Lockdown for Coronavirus Disease 2019 and Its Implications for Ocular Surface Health. *Risk Manag Healthc Policy*. 2021 Apr 19;14:1629–36.
6. Inomata T, Iwagami M, Nakamura M, Shiang T, Yoshimura Y, Fujimoto K, et al. Characteristics and Risk Factors Associated With Diagnosed and Undiagnosed Symptomatic Dry Eye Using a Smartphone Application. *JAMA Ophthalmol*. 2020 Jan 1;138(1):58–68.
7. Ma L-L, Wang Y-Y, Yang Z-H, Huang D, Weng H, Zeng X-T. Methodological quality (risk of bias) assessment tools for primary and secondary medical studies: what are they and which is better? *Mil Med Res*. 2020 Feb 29;7(1):7.
8. Hoy D, Brooks P, Woolf A, Blyth F, March L, Bain C, et al. Assessing risk of bias in prevalence studies: modification of an existing tool and evidence of interrater agreement. *J Clin Epidemiol*. 2012 Sep;65(9):934–9.

9. Simo LP, Agbor VN, AgborNdip E, Ekaney DSM, Mbeng EN, Etombi CL, et al. Prevalence and determinants of anaemia in children aged months in Africa: a protocol for systematic review and meta-analysis. *BMJ Open*. 2020 Apr 16;10(4):e032042.
10. Murad MH, Sultan S, Haffar S, Bazerbachi F. Methodological quality and synthesis of case series and case reports. *BMJ Evid Based Med*. 2018 Apr;23(2):60–3.
11. Mohan A, Sen P, Shah C, Datt K, Jain E. Binocular Accommodation and Vergence Dysfunction in Children Attending Online Classes During the COVID-19 Pandemic: Digital Eye Strain in Kids (DESK) Study-2. *J Pediatr Ophthalmol Strabismus*. 2021 Jul;58(4):224–31.
12. Mohan A, Sen P, Shah C, Jain E, Jain S. Prevalence and risk factor assessment of digital eye strain among children using online e-learning during the COVID-19 pandemic: Digital eye strain among kids (DESK study-1). *Indian J Ophthalmol*. 2021 Jan;69(1):140–4.
13. Chang P, Zhang B, Lin L, Chen R, Chen S, Zhao Y, et al. Comparison of Myopic Progression before, during, and after COVID-19 Lockdown. *Ophthalmology*. 2021 Nov;128(11):1655–7.
14. Gupta R, Chauhan L, Varshney A. Impact of E-Schooling on Digital Eye Strain in Coronavirus Disease Era: A Survey of 654 Students. *J Curr Ophthalmol*. 2021 Apr;33(2):158–64.
15. Wang J, Li Y, Musch DC, Wei N, Qi X, Ding G, et al. Progression of Myopia in School-Aged Children After COVID-19 Home Confinement. *JAMA Ophthalmol*. 2021 Mar 1;139(3):293–300.
16. Elhusseiny AM, Eleiwa TK, Yacoub MS, George J, ElSheikh RH, Haseeb A, et al. Relationship between screen time and dry eye symptoms in pediatric population during the COVID-19 pandemic. *Ocul Surf*. 2021 Oct;22:117–9.
17. Wang W, Zhu L, Zheng S, Ji Y, Xiang Y, Lv B, et al. Survey on the Progression of Myopia in Children and Adolescents in Chongqing During COVID-19 Pandemic. *Front Public Health*. 2021 Apr 28;9:646770.
18. Aslan F, Sahinoglu-Keskek N. The effect of home education on myopia progression in children during the COVID-19 pandemic. *Eye [Internet]*. 2021 Jun 30; Available from: <http://dx.doi.org/10.1038/s41433-021-01655-2>
19. Lv H, Wang Y, Sun S, Wei S, Guo Y, Wu T, et al. The impact of COVID-19 home confinement on axial length in myopic children undergoing orthokeratology. *Clin Exp Optom*. 2022 Jan 4;1–5.
20. Ma D, Wei S, Li S-M, Yang X, Cao K, Hu J, et al. The Impact of Study-at-Home During the COVID-19 Pandemic on Myopia Progression in Chinese Children. *Front Public Health*. 2021;9:720514.
21. Xu L, Ma Y, Yuan J, Zhang Y, Wang H, Zhang G, et al. COVID-19 Quarantine Reveals That Behavioral Changes Have an Effect on Myopia Progression. *Ophthalmology*. 2021 Nov;128(11):1652–4.
22. Hu Y, Zhao F, Ding X, Zhang S, Li Z, Guo Y, et al. Rates of Myopia Development in Young Chinese Schoolchildren During the Outbreak of COVID-19. *JAMA Ophthalmol*. 2021 Oct 1;139(10):1115–21.
23. Li L, Zhang J, Chen M, Li X, Chu Q, Jiang R, et al. Contribution of Total Screen/Online-Course Time to Asthenopia in Children During COVID-19 Pandemic Influencing Psychological Stress.

- 1  
2  
3 Front Public Health. 2021 Dec 1;9:736617.  
4
- 5 24. Li R, Ying B, Qian Y, Chen D, Li X, Zhu H, et al. Prevalence of Self-Reported Symptoms of  
6 Computer Vision Syndrome and Associated Risk Factors among School Students in China during  
7 the COVID-19 Pandemic. *Ophthalmic Epidemiol.* 2021 Aug 25;1–11.  
8
- 9 25. Vagge A, Giannaccare G, Scarinci F, Cacciamani A, Pellegrini M, Bernabei F, et al. Acute Acquired  
10 Concomitant Esotropia From Excessive Application of Near Vision During the COVID-19  
11 Lockdown. *J Pediatr Ophthalmol Strabismus.* 2020 Oct 20;57:e88–91.  
12
- 13 26. Alvarez-Peregrina C, Martinez-Perez C, Villa-Collar C, Andreu-Vázquez C, Ruiz-Pomeda A,  
14 Sánchez-Tena MÁ. Impact of COVID-19 Home Confinement in Children’s Refractive Errors. *Int J*  
15 *Environ Res Public Health* [Internet]. 2021 May 17;18(10). Available from:  
16 <http://dx.doi.org/10.3390/ijerph18105347>  
17
- 18 27. Cremers SL, Khan ARG, Ahn J, Cremers L, Weber J, Kossler AL, et al. New Indicator of Children’s  
19 Excessive Electronic Screen Use and Factors in Meibomian Gland Atrophy. *Am J Ophthalmol.* 2021  
20 Sep;229:63–70.  
21
- 22 28. Mirhajianmoghadam H, Piña A, Ostrin LA. Objective and Subjective Behavioral Measures in  
23 Myopic and Non-Myopic Children During the COVID-19 Pandemic. *Transl Vis Sci Technol.* 2021  
24 Sep 1;10(11):4.  
25
- 26 29. Hamburger JL, Lavrich JB, Rusakevich AM, Leibowitz JA, Zhitnitsky MD, Zhang Q, et al. The  
27 visual consequences of virtual school: acute eye symptoms in healthy children. *J AAPOS* [Internet].  
28 2022 Jan 12; Available from: <http://dx.doi.org/10.1016/j.jaapos.2021.10.003>  
29
- 30 30. Wong CW, Tsai A, Jonas JB, Ohno-Matsui K, Chen J, Ang M, et al. Digital Screen Time During the  
31 COVID-19 Pandemic: Risk for a Further Myopia Boom? *Am J Ophthalmol.* 2021 Mar;223:333–7.  
32
- 33 31. Jones-Jordan LA, Mitchell GL, Cotter SA, Kleinstein RN, Manny RE, Mutti DO, et al. Visual  
34 activity before and after the onset of juvenile myopia. *Invest Ophthalmol Vis Sci.* 2011  
35 Mar;52(3):1841–50.  
36
- 37 32. Mccrann S, Loughman J, Butler JS, Paudel N, Flitcroft DI. Smartphone use as a possible risk factor  
38 for myopia. *Clin Exp Optom.* 2021 Jan;104(1):35–41.  
39
- 40 33. Lanca C, Saw S-M. The association between digital screen time and myopia: A systematic review.  
41 *Ophthalmic Physiol Opt.* 2020 Mar;40(2):216–29.  
42
- 43 34. He M, Xiang F, Zeng Y, Mai J, Chen Q, Zhang J, et al. Effect of Time Spent Outdoors at School on  
44 the Development of Myopia Among Children in China: A Randomized Clinical Trial. *JAMA.* 2015  
45 Sep 15;314(11):1142–8.  
46
- 47 35. McCarthy CS, Megaw P, Devadas M, Morgan IG. Dopaminergic agents affect the ability of brief  
48 periods of normal vision to prevent form-deprivation myopia. *Exp Eye Res.* 2007 Jan;84(1):100–7.  
49
- 50 36. Feldkaemper M, Schaeffel F. An updated view on the role of dopamine in myopia. *Exp Eye Res.*  
51 2013 Sep;114:106–19.  
52
- 53 37. Wu P-C, Chen C-T, Lin K-K, Sun C-C, Kuo C-N, Huang H-M, et al. Myopia Prevention and  
54 Outdoor Light Intensity in a School-Based Cluster Randomized Trial. *Ophthalmology.* 2018  
55 Aug;125(8):1239–50.  
56  
57  
58  
59

38. Ip JM, Saw S-M, Rose KA, Morgan IG, Kifley A, Wang JJ, et al. Role of near work in myopia: findings in a sample of Australian school children. *Invest Ophthalmol Vis Sci*. 2008 Jul;49(7):2903–10.
39. Si J-K, Tang K, Bi H-S, Guo D-D, Guo J-G, Wang X-R. Orthokeratology for myopia control: a meta-analysis. *Optom Vis Sci*. 2015 Mar;92(3):252–7.
40. Wong YL, Yuan Y, Su B, Tufail S, Ding Y, Ye Y, et al. Prediction of myopia onset with refractive error measured using non-cycloplegic subjective refraction: the WEPrOM Study. *BMJ Open Ophthalmol*. 2021 Jun 9;6(1):e000628.
41. Lee HS, Park SW, Heo H. Acute acquired comitant esotropia related to excessive Smartphone use. *BMC Ophthalmol*. 2016 Apr 9;16:37.
42. Motlagh M, Geetha R. Physiology, Accommodation. In: *StatPearls* [Internet]. StatPearls Publishing; 2021.
43. Uchino M, Yokoi N, Uchino Y, Dogru M, Kawashima M, Komuro A, et al. Prevalence of dry eye disease and its risk factors in visual display terminal users: the Osaka study. *Am J Ophthalmol*. 2013 Oct;156(4):759–66.
44. Hanyuda A, Sawada N, Uchino M, Kawashima M, Yuki K, Tsubota K, et al. Physical inactivity, prolonged sedentary behaviors, and use of visual display terminals as potential risk factors for dry eye disease: JPHC-NEXT study. *Ocul Surf*. 2020 Jan;18(1):56–63.
45. Bhattacharya S, Saleem SM, Singh A. Digital eye strain in the era of COVID-19 pandemic: An emerging public health threat. *Indian J Ophthalmol*. 2020 Aug;68(8):1709–10.
46. Rojas-Carabali W, Uribe-Reina P, Muñoz-Ortiz J, Terreros-Dorado JP, Ruiz-Botero ME, Torres-Arias N, et al. High Prevalence of Abnormal Ocular Surface Tests in a Healthy Pediatric Population. *Clin Ophthalmol*. 2020 Oct 22;14:3427–38.
47. Rossi GCM, Scudeller L, Bettio F, Pasinetti GM, Bianchi PE. Prevalence of dry eye in video display terminal users: a cross-sectional Caucasian study in Italy. *Int Ophthalmol*. 2019 Jun;39(6):1315–22.

## Figure Legend:

Figure 1- PRISMA Flow Diagram



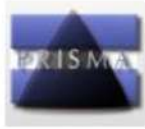

## PRISMA 2009 Flow Diagram

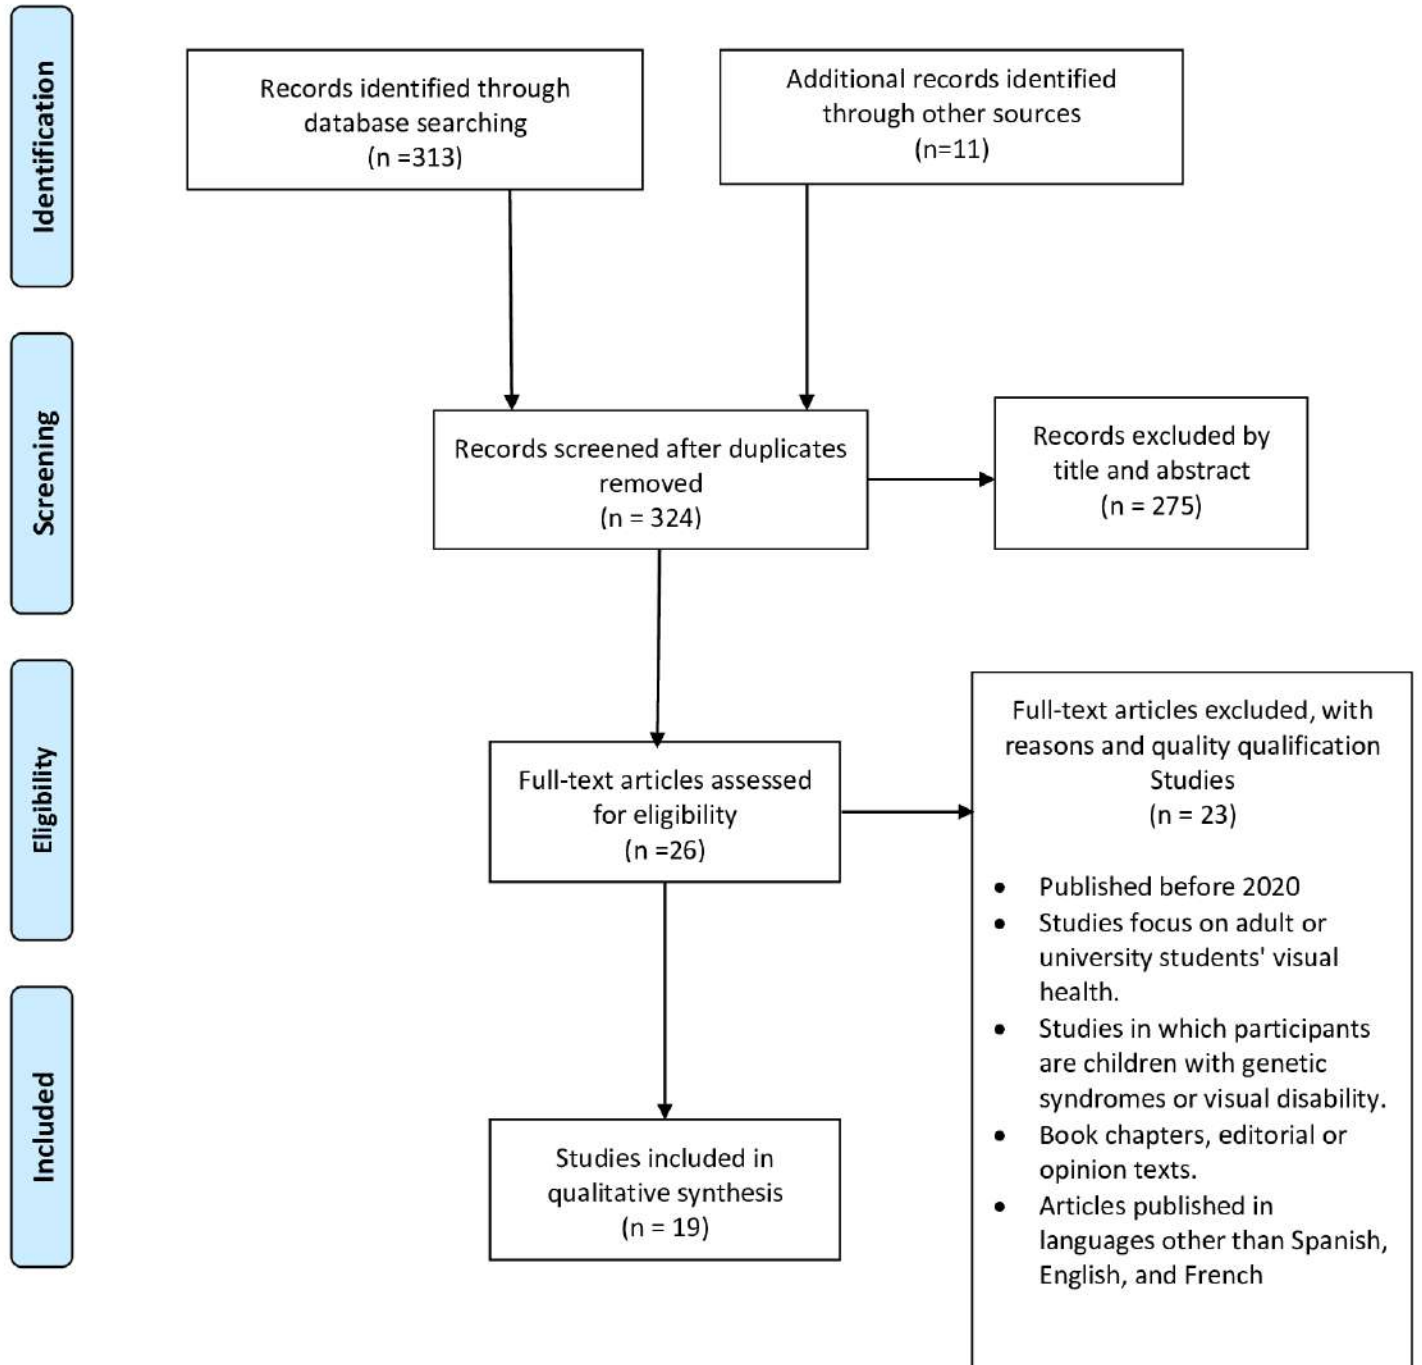

From: Moher D, Liberati A, Tetzlaff J, Altman DG, The PRISMA Group (2009). Preferred Reporting Items for Systematic Reviews and Meta-Analyses: The PRISMA Statement. PLoS Med 6(6): e1000097. doi:10.1371/journal.pmed1000097

For more information, visit [www.prisma-statement.org](http://www.prisma-statement.org).

Supplementary table 1: PRISMA 2020 Checklist

| Section and Topic             | Item # | Checklist item                                                                                                                                                                                                                                                                                       | Location where item is reported           |
|-------------------------------|--------|------------------------------------------------------------------------------------------------------------------------------------------------------------------------------------------------------------------------------------------------------------------------------------------------------|-------------------------------------------|
| <b>TITLE</b>                  |        |                                                                                                                                                                                                                                                                                                      |                                           |
| Title                         | 1      | Identify the report as a systematic review.                                                                                                                                                                                                                                                          | 1                                         |
| <b>ABSTRACT</b>               |        |                                                                                                                                                                                                                                                                                                      |                                           |
| Abstract                      | 2      | See the PRISMA 2020 for Abstracts checklist.                                                                                                                                                                                                                                                         | 2 Abstract                                |
| <b>INTRODUCTION</b>           |        |                                                                                                                                                                                                                                                                                                      |                                           |
| Rationale                     | 3      | Describe the rationale for the review in the context of existing knowledge.                                                                                                                                                                                                                          | 3, 4: Key questions<br>5:<br>Introduction |
| Objectives                    | 4      | Provide an explicit statement of the objective(s) or question(s) the review addresses.                                                                                                                                                                                                               | 6                                         |
| <b>METHODS</b>                |        |                                                                                                                                                                                                                                                                                                      |                                           |
| Eligibility criteria          | 5      | Specify the inclusion and exclusion criteria for the review and how studies were grouped for the syntheses.                                                                                                                                                                                          | 7                                         |
| Information sources           | 6      | Specify all databases, registers, websites, organisations, reference lists and other sources searched or consulted to identify studies. Specify the date when each source was last searched or consulted.                                                                                            | 6                                         |
| Search strategy               | 7      | Present the full search strategies for all databases, registers and websites, including any filters and limits used.                                                                                                                                                                                 | 6                                         |
| Selection process             | 8      | Specify the methods used to decide whether a study met the inclusion criteria of the review, including how many reviewers screened each record and each report retrieved, whether they worked independently, and if applicable, details of automation tools used in the process.                     | 7, 8                                      |
| Data collection process       | 9      | Specify the methods used to collect data from reports, including how many reviewers collected data from each report, whether they worked independently, any processes for obtaining or confirming data from study investigators, and if applicable, details of automation tools used in the process. | 7, 8                                      |
| Data items                    | 10a    | List and define all outcomes for which data were sought. Specify whether all results that were compatible with each outcome domain in each study were sought (e.g. for all measures, time points, analyses), and if not, the methods used to decide which results to collect.                        | 7, 8                                      |
|                               | 10b    | List and define all other variables for which data were sought (e.g. participant and intervention characteristics, funding sources). Describe any assumptions made about any missing or unclear information.                                                                                         | N.A                                       |
| Study risk of bias assessment | 11     | Specify the methods used to assess risk of bias in the included studies, including details of the tool(s) used, how many reviewers assessed each study and whether they worked independently, and if applicable, details of automation tools used in the process.                                    | 7,<br>Supplemental table 1                |
| Effect measures               | 12     | Specify for each outcome the effect measure(s) (e.g. risk ratio, mean difference) used in the synthesis or presentation of results.                                                                                                                                                                  | N.A                                       |

|                                                             |                           |     |                                                                                                                                                                                                                                                             |                      |
|-------------------------------------------------------------|---------------------------|-----|-------------------------------------------------------------------------------------------------------------------------------------------------------------------------------------------------------------------------------------------------------------|----------------------|
| 1<br>2<br>3<br>4<br>5<br>6<br>7<br>8<br>9<br>10<br>11<br>12 | Synthesis methods         | 13a | Describe the processes used to decide which studies were eligible for each synthesis (e.g. tabulating the study intervention characteristics and comparing against the planned groups for each synthesis (item #5)).                                        | 7, 8                 |
| 13                                                          |                           | 13b | Describe any methods required to prepare the data for presentation or synthesis, such as handling of missing summary statistics, or data conversions.                                                                                                       | 7                    |
| 14                                                          |                           | 13c | Describe any methods used to tabulate or visually display results of individual studies and syntheses.                                                                                                                                                      | 8                    |
| 15                                                          |                           | 13d | Describe any methods used to synthesize results and provide a rationale for the choice(s). If meta-analysis was performed, describe the model(s), method(s) to identify the presence and extent of statistical heterogeneity, and software package(s) used. | 8                    |
| 16                                                          |                           | 13e | Describe any methods used to explore possible causes of heterogeneity among study results (e.g. subgroup analysis, meta-regression).                                                                                                                        | 8                    |
| 17                                                          |                           | 13f | Describe any sensitivity analyses conducted to assess robustness of the synthesized results.                                                                                                                                                                | N.A                  |
| 18                                                          | Reporting bias assessment | 14  | Describe any methods used to assess risk of bias due to missing results in a synthesis (arising from reporting biases).                                                                                                                                     | Supplemental table 1 |
| 19                                                          | Certainty assessment      | 15  | Describe any methods used to assess certainty (or confidence) in the body of evidence for an outcome.                                                                                                                                                       | N.A                  |

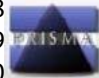

### PRISMA 2020 Checklist

| Section and Topic             | Item # | Checklist item                                                                                                                                                                                                                   | Location where item is reported |
|-------------------------------|--------|----------------------------------------------------------------------------------------------------------------------------------------------------------------------------------------------------------------------------------|---------------------------------|
| <b>RESULTS</b>                |        |                                                                                                                                                                                                                                  |                                 |
| Study selection               | 16a    | Describe the results of the search and selection process, from the number of records identified in the search to the number of studies included in the review, ideally using a flow diagram.                                     | 8-10                            |
|                               | 16b    | Cite studies that might appear to meet the inclusion criteria, but which were excluded, and explain why they were excluded.                                                                                                      | 7                               |
| Study characteristics         | 17     | Cite each included study and present its characteristics.                                                                                                                                                                        | 8-10                            |
| Risk of bias in studies       | 18     | Present assessments of risk of bias for each included study.                                                                                                                                                                     | 7, Supplementary table 1        |
| Results of individual studies | 19     | For all outcomes, present, for each study: (a) summary statistics for each group (where appropriate) and (b) an effect estimate and its precision (e.g. confidence/credible interval), ideally using structured tables or plots. | N.A                             |
| Results of syntheses          | 20a    | For each synthesis, briefly summarise the characteristics and risk of bias among contributing studies.                                                                                                                           | 8, Supplementary table 1        |

|    |                                                |     |                                                                                                                                                                                                                                                                                      |                       |
|----|------------------------------------------------|-----|--------------------------------------------------------------------------------------------------------------------------------------------------------------------------------------------------------------------------------------------------------------------------------------|-----------------------|
| 1  |                                                | 20b | Present results of all statistical syntheses conducted. If meta-analysis was done, present for each the summary estimate and its precision (e.g. confidence/credible interval) and measures of statistical heterogeneity. If comparing groups, describe the direction of the effect. | N.A                   |
| 2  |                                                |     |                                                                                                                                                                                                                                                                                      |                       |
| 3  |                                                |     |                                                                                                                                                                                                                                                                                      |                       |
| 4  |                                                | 20c | Present results of all investigations of possible causes of heterogeneity among study results.                                                                                                                                                                                       | N.A                   |
| 5  |                                                |     |                                                                                                                                                                                                                                                                                      |                       |
| 6  |                                                | 20d | Present results of all sensitivity analyses conducted to assess the robustness of the synthesized results.                                                                                                                                                                           | N.A                   |
| 7  | Reporting biases                               | 21  | Present assessments of risk of bias due to missing results (arising from reporting biases) for each synthesis assessed.                                                                                                                                                              | N.A                   |
| 8  |                                                |     |                                                                                                                                                                                                                                                                                      |                       |
| 9  | Certainty of evidence                          | 22  | Present assessments of certainty (or confidence) in the body of evidence for each outcome assessed.                                                                                                                                                                                  | Supplementary table 1 |
| 10 |                                                |     |                                                                                                                                                                                                                                                                                      |                       |
| 11 |                                                |     |                                                                                                                                                                                                                                                                                      |                       |
| 12 | <b>DISCUSSION</b>                              |     |                                                                                                                                                                                                                                                                                      |                       |
| 13 | Discussion                                     | 23a | Provide a general interpretation of the results in the context of other evidence.                                                                                                                                                                                                    | 10-17                 |
| 14 |                                                |     |                                                                                                                                                                                                                                                                                      |                       |
| 15 |                                                | 23b | Discuss any limitations of the evidence included in the review.                                                                                                                                                                                                                      | N.A                   |
| 16 |                                                |     |                                                                                                                                                                                                                                                                                      |                       |
| 17 |                                                | 23c | Discuss any limitations of the review processes used.                                                                                                                                                                                                                                | N.A                   |
| 18 |                                                |     |                                                                                                                                                                                                                                                                                      |                       |
| 19 |                                                | 23d | Discuss implications of the results for practice, policy, and future research.                                                                                                                                                                                                       | 17                    |
| 20 | <b>OTHER INFORMATION</b>                       |     |                                                                                                                                                                                                                                                                                      |                       |
| 21 |                                                |     |                                                                                                                                                                                                                                                                                      |                       |
| 22 | Registration and protocol                      | 24a | Provide registration information for the review, including register name and registration number, or state that the review was not registered.                                                                                                                                       | 3                     |
| 23 |                                                |     |                                                                                                                                                                                                                                                                                      |                       |
| 24 |                                                | 24b | Indicate where the review protocol can be accessed, or state that a protocol was not prepared.                                                                                                                                                                                       | 3                     |
| 25 |                                                |     |                                                                                                                                                                                                                                                                                      |                       |
| 26 |                                                | 24c | Describe and explain any amendments to information provided at registration or in the protocol.                                                                                                                                                                                      | N.A                   |
| 27 | Support                                        | 25  | Describe sources of financial or non-financial support for the review, and the role of the funders or sponsors in the review.                                                                                                                                                        | 18                    |
| 28 |                                                |     |                                                                                                                                                                                                                                                                                      |                       |
| 29 | Competing interests                            | 26  | Declare any competing interests of review authors.                                                                                                                                                                                                                                   | 18                    |
| 30 |                                                |     |                                                                                                                                                                                                                                                                                      |                       |
| 31 | Availability of data, code and other materials | 27  | Report which of the following are publicly available and where they can be found: template data collection forms; data extracted from included studies; data used for all analyses; analytic code; any other materials used in the review.                                           | 18                    |
| 32 |                                                |     |                                                                                                                                                                                                                                                                                      |                       |
| 33 |                                                |     |                                                                                                                                                                                                                                                                                      |                       |
| 34 |                                                |     |                                                                                                                                                                                                                                                                                      |                       |
| 35 |                                                |     |                                                                                                                                                                                                                                                                                      |                       |
| 36 |                                                |     |                                                                                                                                                                                                                                                                                      |                       |
| 37 |                                                |     |                                                                                                                                                                                                                                                                                      |                       |

38  
39 From: Page MJ, McKenzie JE, Bossuyt PM, Boutron I, Hoffmann TC, Mulrow CD, et al. The PRISMA 2020 statement: an updated guideline for reporting  
40 systematic reviews. *BMJ* 2021;372:n71. doi:  
41 10.1136/bmj.n71

42  
43 For more information, visit: <http://www.prisma-statement.org/>

44  
45 For peer review only - <http://bmjopen.bmj.com/site/about/guidelines.xhtml>

46

47

**Supplementary Table 2: Risk of bias assessment**

**Risk of bias assessment of cross-sectional studies using the Hoy et al. proposed tool.**

| Article                                                                                                                                                       | Question 1     | Question 2     | Question 3     | Question 4     | Question 5     | Question 6     | Question 7     | Question 8     | Question 9     | Question 10    | Summary on the overall risk of study bias |
|---------------------------------------------------------------------------------------------------------------------------------------------------------------|----------------|----------------|----------------|----------------|----------------|----------------|----------------|----------------|----------------|----------------|-------------------------------------------|
| Relationship between screen time and dry eye symptoms in pediatric population during the COVID-19 pandemic.                                                   | YES (LOW RISK) | NO (HIGH RISK) | YES (LOW RISK) | YES (LOW RISK) | Low risk                                  |
|                                                                                                                                                               |                |                |                |                |                |                |                |                |                |                | Moderate risk                             |
|                                                                                                                                                               |                |                |                |                |                |                |                |                |                |                | High risk                                 |
| Impact of COVID-19 Home Confinement in Children’s Refractive Errors                                                                                           | YES (LOW RISK) | Low risk                                  |
|                                                                                                                                                               |                |                |                |                |                |                |                |                |                |                | Moderate risk                             |
|                                                                                                                                                               |                |                |                |                |                |                |                |                |                |                | High risk                                 |
| Binocular accommodation and vergence dysfunction in children attending online classes during the COVID-19 pandemic: digital eye strain in kids (DESK) study-2 | NO (HIGH RISK) | YES (LOW RISK) | NO (HIGH RISK) | NO (HIGH RISK) | YES (LOW RISK) | Low risk                                  |
|                                                                                                                                                               |                |                |                |                |                |                |                |                |                |                | Moderate risk                             |
|                                                                                                                                                               |                |                |                |                |                |                |                |                |                |                | High risk                                 |
| Objective and subjective behavioral measures in myopic and non-myopic children during the covid-19 pandemic                                                   | NO (HIGH RISK) | YES (LOW RISK) | NO (HIGH RISK) | NO (HIGH RISK) | YES (LOW RISK) | NO (HIGH RISK) | YES (LOW RISK) | YES (LOW RISK) | YES (LOW RISK) | YES (LOW RISK) | Low risk                                  |
|                                                                                                                                                               |                |                |                |                |                |                |                |                |                |                | Moderate risk                             |
|                                                                                                                                                               |                |                |                |                |                |                |                |                |                |                | High risk                                 |
| The visual consequences of virtual school: acute eye symptoms in healthy children                                                                             | NO (HIGH RISK) | YES (LOW RISK) | NO (HIGH RISK) | NO (HIGH RISK) | YES (LOW RISK) | NO (HIGH RISK) | YES (LOW RISK) | YES (LOW RISK) | YES (LOW RISK) | YES (LOW RISK) | Low risk                                  |
|                                                                                                                                                               |                |                |                |                |                |                |                |                |                |                | Moderate risk                             |
|                                                                                                                                                               |                |                |                |                |                |                |                |                |                |                | High risk                                 |
| Impact of E-schooling on digital eye strain in Coronavirus Disease Era: A survey of 654 students                                                              | YES (LOW RISK) | NO (HIGH RISK) | YES (LOW RISK) | YES (LOW RISK) | YES (LOW RISK) | YES (LOW RISK) | Low risk                                  |
|                                                                                                                                                               |                |                |                |                |                |                |                |                |                |                | Moderate risk                             |
|                                                                                                                                                               |                |                |                |                |                |                |                |                |                |                | High risk                                 |
|                                                                                                                                                               | YES            | NO             | YES            | NO             | YES            | YES            | YES            | YES            | YES            | YES            | Low risk                                  |

|                                                                                                                                                                              |                |                |                |                |                |                |                |                |                |                |                |               |
|------------------------------------------------------------------------------------------------------------------------------------------------------------------------------|----------------|----------------|----------------|----------------|----------------|----------------|----------------|----------------|----------------|----------------|----------------|---------------|
| Prevalence and risk factor assessment of digital eye strain among children using online elearning during the COVID-19 pandemic: Digital eye strain among kids (DESK study-1) | (LOW RISK)     | (HIGH RISK)    | (LOW RISK)     | (HIGH RISK)    | (LOW RISK)     | (LOW RISK)     | (LOW RISK)     | (LOW RISK)     | (LOW RISK)     | (LOW RISK)     | (LOW RISK)     | Moderate risk |
|                                                                                                                                                                              |                |                |                |                |                |                |                |                |                |                |                | High risk     |
| Progression of Myopia in School-Aged Children after COVID-19 Home Confinement                                                                                                | NO (HIGH RISK) | NO (HIGH RISK) | NO (HIGH RISK) | YES (LOW RISK) | Low risk      |
|                                                                                                                                                                              |                |                |                |                |                |                |                |                |                |                |                | Moderate risk |
|                                                                                                                                                                              |                |                |                |                |                |                |                |                |                |                |                | High risk     |

Interpretation: Low risk: 0-4 (No:High risk), Moderate risk: 5-7 (No:High risk), High risk 8-10 (No:High risk)

**Risk of bias assessment for before-and-after studies using NIH tool.**

| Article                                                                                                      | Question 1 | Question 2 | Question 3 | Question 4 | Question 5 | Question 6 | Question 7 | Question 8 | Question 9 | Question 10 | Question 11 | Question 12 | Quality Rating |
|--------------------------------------------------------------------------------------------------------------|------------|------------|------------|------------|------------|------------|------------|------------|------------|-------------|-------------|-------------|----------------|
| Comparison of Myopic Progression before, during, and after COVID-19 Lockdown<br>10.1016/j.ophtha.2021.03.029 | YES        | NO         | YES        | CD         | NR         | YES        | YES        | NR         | NO         | YES         | YES         | YES         | Good           |
|                                                                                                              |            |            |            |            |            |            |            |            |            |             |             |             | Fair           |
|                                                                                                              |            |            |            |            |            |            |            |            |            |             |             |             | Poor           |
| Survey on the Progression of Myopia in Children and Adolescents in Chongqing During COVID-19 Pandemic        | YES        | NR         | YES        | YES         | NO          | YES         | Good           |
|                                                                                                              |            |            |            |            |            |            |            |            |            |             |             |             | Fair           |
|                                                                                                              |            |            |            |            |            |            |            |            |            |             |             |             | Poor           |
| The effect of home education on myopia progression in children during the COVID-19 pandemic                  | YES        | YES        | NR         | YES        | CD         | YES        | YES        | NR         | YES        | YES         | NO          | YES         | Good           |
|                                                                                                              |            |            |            |            |            |            |            |            |            |             |             |             | Fair           |
|                                                                                                              |            |            |            |            |            |            |            |            |            |             |             |             | Poor           |
|                                                                                                              | YES        | YES        | NR         | NR         | CD         | YES        | YES        | NR         | CD         | YES         | NO          | YES         | Good           |

1  
2  
3  
4  
5  
6  
7  
8  
9  
10  
11  
12  
13  
14  
15  
16  
17  
18  
19  
20  
21  
22  
23  
24  
25  
26  
27  
28  
29  
30  
31  
32  
33  
34  
35  
36  
37  
38  
39  
40  
41  
42  
43  
44  
45  
46  
47

|                                                                                                                                                          |     |     |     |     |     |     |     |     |     |     |     |     |      |      |
|----------------------------------------------------------------------------------------------------------------------------------------------------------|-----|-----|-----|-----|-----|-----|-----|-----|-----|-----|-----|-----|------|------|
| The impact of COVID-19 home confinement on axial length in myopic children undergoing orthokeratology                                                    |     |     |     |     |     |     |     |     |     |     |     |     |      | Fair |
|                                                                                                                                                          |     |     |     |     |     |     |     |     |     |     |     |     |      | Poor |
| COVID-19 Quarantine Reveals That Behavioral Changes Have an Effect on Myopia Progression.<br>10.1016/j.ophtha.2021.04.001                                | YES | NR  | YES | YES | CD  | YES | Good |      |
|                                                                                                                                                          |     |     |     |     |     |     |     |     |     |     |     |     | Fair |      |
|                                                                                                                                                          |     |     |     |     |     |     |     |     |     |     |     |     | Poor |      |
| Contribution of Total Screen/Online-Course Time to Asthenopia in Children During COVID-19 Pandemic via Influencing Psychological Stress                  | YES | Good |      |
|                                                                                                                                                          |     |     |     |     |     |     |     |     |     |     |     |     | Fair |      |
|                                                                                                                                                          |     |     |     |     |     |     |     |     |     |     |     |     | Poor |      |
| Prevalence of Self-Reported Symptoms of Computer Vision Syndrome and Associated Risk Factors among School Students in China during the COVID 19 Pandemic | YES |     | Good |      |
|                                                                                                                                                          |     |     |     |     |     |     |     |     |     |     |     |     | Fair |      |
|                                                                                                                                                          |     |     |     |     |     |     |     |     |     |     |     |     | Poor |      |

Interpretation: Good: 10 or more YES; Fare: 6 or more YES; Poor: 5 or less YES Abbreviations:

CD: Cannot Determine; NR: Not reported.

**Risk of bias assessment of case series using the Murad MH et al. proposed tool.**

| Article                                                                                                     | Selection  | Ascertainment |            | Causality  |            |            |            | Reporting  |
|-------------------------------------------------------------------------------------------------------------|------------|---------------|------------|------------|------------|------------|------------|------------|
|                                                                                                             | Question 1 | Question 2    | Question 3 | Question 4 | Question 5 | Question 6 | Question 7 | Question 8 |
| Acute Acquired Concomitant Esotropia From Excessive Application of Near Vision During the COVID-19 Lockdown | YES        | YES           | YES        | YES        | NA         | NA         | NO         | YES        |

**Risk of bias assessment of cohort studies using the NEWCASTLE - OTTAWA QUALITY ASSESSMENT SCALE**

| Article                                                                                          | Selection                                                                                                     |                                                             |                                                                     |                                                                                     | Comparability                                                              | Outcome                                                                            |                                                                                                                                           |                                                                                                       | Overall  |
|--------------------------------------------------------------------------------------------------|---------------------------------------------------------------------------------------------------------------|-------------------------------------------------------------|---------------------------------------------------------------------|-------------------------------------------------------------------------------------|----------------------------------------------------------------------------|------------------------------------------------------------------------------------|-------------------------------------------------------------------------------------------------------------------------------------------|-------------------------------------------------------------------------------------------------------|----------|
|                                                                                                  | Question 1                                                                                                    | Question 2                                                  | Question 3                                                          | Question 4                                                                          | Question 1                                                                 | Question 1                                                                         | Question 2                                                                                                                                | Question 3                                                                                            |          |
| The Impact of Study-atHome During the COVID19 Pandemic on Myopia Progression in Chinese Children | 1 Star. Truly representative of the average primary schools in Fuxing District, Handan, Hebei, China children | 1 Star. Drawn from the same community as the exposed cohort | 1 Star. Secure record (eg medical records and clinical evaluations) | 0 Star.                                                                             | 1 Star. Study controls for not exposed to exposure factors (study at home) | 1 Star. Confirmation of the outcome by reference to secure records and self report | 1 Star. Yes: 6 months Assessment at baseline (July 2019), at the first follow-up (January 2020) and at the second follow-up (August 2020) | 0 Star. No statement                                                                                  | 6 Stars. |
| Rates of Myopia Development in Young Chinese Schoolchildren During the Outbreak of COVID-19      | 1 Star. somewhat representative of the average children in the community. (Especially, young school children) | 1 Star. Drawn from the same community as the exposed cohort | 1 Star. Secure record (eg medical records and clinical evaluations) | 1 Star. They described the percentages of patients without the outcome at baseline. | 1 Star. Study controls for grade.                                          | 1 Star. Confirmation of the outcome by reference to secure records.                | 1 Star. 3 measurements in 3 years.                                                                                                        | 1 Star. Subjects lost to follow up unlikely to introduce bias - small number lost - < 20 % follow up. | 7 Stars. |



# BMJ Open

## Effects of remote learning during the COVID-19 lockdown on children's visual health: a Systematic Review

|                                 |                                                                                                                                                                                                                                                                                                                                                                                                                                                                                                                                                                                                                                                                                                                                                                                       |
|---------------------------------|---------------------------------------------------------------------------------------------------------------------------------------------------------------------------------------------------------------------------------------------------------------------------------------------------------------------------------------------------------------------------------------------------------------------------------------------------------------------------------------------------------------------------------------------------------------------------------------------------------------------------------------------------------------------------------------------------------------------------------------------------------------------------------------|
| Journal:                        | <i>BMJ Open</i>                                                                                                                                                                                                                                                                                                                                                                                                                                                                                                                                                                                                                                                                                                                                                                       |
| Manuscript ID                   | bmjopen-2022-062388.R1                                                                                                                                                                                                                                                                                                                                                                                                                                                                                                                                                                                                                                                                                                                                                                |
| Article Type:                   | Original research                                                                                                                                                                                                                                                                                                                                                                                                                                                                                                                                                                                                                                                                                                                                                                     |
| Date Submitted by the Author:   | 24-May-2022                                                                                                                                                                                                                                                                                                                                                                                                                                                                                                                                                                                                                                                                                                                                                                           |
| Complete List of Authors:       | Cortés-Albornoz, María ; Universidad del Rosario, Neuroscience Research Group (NEUROS) and Centro Neurovitae, School of Medicine and Health Sciences<br>Ramírez-Guerrero, Sofía; Universidad del Rosario, Neuroscience Research Group (NEUROS) and Centro Neurovitae, School of Medicine and Health Sciences<br>Rojas-Carabali, William; Universidad del Rosario, Neuroscience Research Group (NEUROS) and Centro Neurovitae, School of Medicine and Health Sciences<br>de-la-Torre, Alejandra; Universidad del Rosario, Neuroscience Research Group (NEUROS) and Centro Neurovitae, School of Medicine and Health Sciences<br>Talero-Gutiérrez, Claudia; Universidad del Rosario, Neuroscience Research Group (NEUROS) and Centro Neurovitae, School of Medicine and Health Sciences |
| <b>Primary Subject Heading</b>: | Ophthalmology                                                                                                                                                                                                                                                                                                                                                                                                                                                                                                                                                                                                                                                                                                                                                                         |
| Secondary Subject Heading:      | Health policy                                                                                                                                                                                                                                                                                                                                                                                                                                                                                                                                                                                                                                                                                                                                                                         |
| Keywords:                       | COVID-19, PAEDIATRICS, Paediatric ophthalmology < OPHTHALMOLOGY                                                                                                                                                                                                                                                                                                                                                                                                                                                                                                                                                                                                                                                                                                                       |
|                                 |                                                                                                                                                                                                                                                                                                                                                                                                                                                                                                                                                                                                                                                                                                                                                                                       |

SCHOLARONE™  
Manuscripts



I, the Submitting Author has the right to grant and does grant on behalf of all authors of the Work (as defined in the below author licence), an exclusive licence and/or a non-exclusive licence for contributions from authors who are: i) UK Crown employees; ii) where BMJ has agreed a CC-BY licence shall apply, and/or iii) in accordance with the terms applicable for US Federal Government officers or employees acting as part of their official duties; on a worldwide, perpetual, irrevocable, royalty-free basis to BMJ Publishing Group Ltd ("BMJ") its licensees and where the relevant Journal is co-owned by BMJ to the co-owners of the Journal, to publish the Work in this journal and any other BMJ products and to exploit all rights, as set out in our [licence](#).

The Submitting Author accepts and understands that any supply made under these terms is made by BMJ to the Submitting Author unless you are acting as an employee on behalf of your employer or a postgraduate student of an affiliated institution which is paying any applicable article publishing charge ("APC") for Open Access articles. Where the Submitting Author wishes to make the Work available on an Open Access basis (and intends to pay the relevant APC), the terms of reuse of such Open Access shall be governed by a Creative Commons licence – details of these licences and which [Creative Commons](#) licence will apply to this Work are set out in our licence referred to above.

Other than as permitted in any relevant BMJ Author's Self Archiving Policies, I confirm this Work has not been accepted for publication elsewhere, is not being considered for publication elsewhere and does not duplicate material already published. I confirm all authors consent to publication of this Work and authorise the granting of this licence.

1  
2  
3  
4 **Title:** Effects of remote learning during the COVID-19 lockdown on children's visual health: a  
5 Systematic Review  
6

7  
8 **Author names:** María C. Cortés-Albornoz<sup>1</sup>, Sofía Ramírez-Guerrero<sup>1</sup>; William Rojas-Carabali<sup>1</sup>;  
9 Alejandra de-la-Torre<sup>1</sup>; Claudia Talero-Gutiérrez<sup>1\*</sup>  
10

11 **Author affiliations:** 1. Neuroscience Research Group (NEUROS) and Centro Neurovitae, School  
12 of Medicine and Health Sciences, Universidad del Rosario, Bogotá  
13  
14

15 **Corresponding author:** Claudia Talero-Gutiérrez, Kra 24#63C-69. Escuela de Medicina y  
16 Ciencias de la Salud- Quinta de Mutis (Bogotá, Colombia), +573158959271,  
17 [claudia.talero@urosario.edu.co](mailto:claudia.talero@urosario.edu.co)  
18

19  
20 **Author notes:**

21  
22 María C. Cortés-Albornoz, MD: <https://orcid.org/0000-0003-0733-5105>,  
23 [mariacam.cortes@urosario.edu.co](mailto:mariacam.cortes@urosario.edu.co)  
24

25  
26 Sofía Ramírez-Guerrero: <https://orcid.org/0000-0001-8927-8284>,  
27 [sofia.ramirezg@urosario.edu.co](mailto:sofia.ramirezg@urosario.edu.co)  
28

29  
30 William Rojas-Carabali, MD: <https://orcid.org/0000-0002-9976-8989>, [warcinvest@gmail.com](mailto:warcinvest@gmail.com)  
31

32 Alejandra de-la-Torre, MD, PhD: <https://orcid.org/0000-0003-0684-1989>,  
33 [alejadelatorre@yahoo.com](mailto:alejadelatorre@yahoo.com)  
34

35  
36 Claudia Talero-Gutiérrez, MD: [orcid.org/0000-0003-1601-5015](https://orcid.org/0000-0003-1601-5015), [claudia.talero@urosario.edu.co](mailto:claudia.talero@urosario.edu.co)  
37

38 Word count: 3.713  
39  
40  
41  
42  
43  
44  
45  
46  
47  
48  
49  
50  
51  
52  
53  
54  
55  
56  
57  
58  
59  
60

## ABSTRACT

**Objectives:** Increased exposure to digital devices as part of online classes increases susceptibility to visual impairments, particularly among school students taught using e-learning strategies. This study aimed to identify the impact of remote learning during the COVID-19 lockdown on children's visual health.

**Design:** Systematic review using the PRISMA guidelines

**Data sources:** Scopus, PubMed, and ScienceDirect databases from the year 2020 onwards

**Eligibility Criteria:** We included cross-sectional, case-control, and cohort studies, case series, and case reports, published in English, Spanish, or French, that approached the effects of remote learning during the COVID-19 lockdown on visual health in neurotypical children.

**Data extraction and synthesis:** We included a total of 19 articles with previous quality assessments using the Joanna Briggs checklist. Risk of bias assessment was applied using National Institutes of Health (NIH) quality assessment tool for before-after studies with no control group, the tool developed by Hoy et al. to assess cross-sectional studies, the Murad et al. tool to evaluate the methodological quality of case reports and case series, and the Newcastle-Ottawa Scale for cohort studies.

**Results:** All but one study reported a deleterious impact of the COVID-19 lockdown on visual health in children. Overall, the most frequently identified ocular effects were refractive errors, accommodation disturbances, and visual symptoms such as dry eye and asthenopia.

**Conclusions:** Increased dependence on digital devices for online classes has either induced or exacerbated visual disturbances, such as rapid progression of myopia, dry eye and visual fatigue symptoms, and vergence and accommodation disturbances, in children who engaged in remote learning during the COVID-19 lockdown.

**PROSPERO registration number** CRD42022307107

**Keywords:** Children; COVID-19; Distance education; Lockdown; Remote learning; Myopia; Screen time; Vision.

## STRENGTHS AND LIMITATIONS

- A systematic review was conducted in three different databases, studies were filtered following the preferred reporting items for systematic reviews and meta-analyses (PRISMA) guidelines.
- Analyzed studies approached the effects of remote learning during the COVID-19 lockdown on visual health in children.
- To facilitate comparison, eligible studies were clustered according to the main ocular effects evaluated, including refractive errors (myopia), accommodation disturbances (esotropia) and visual symptoms (dry eye and fatigue).
- We used quality assessment guidelines and specific risk of bias assessment tools for each study design included.
- Heterogeneous methods used in each study, including both subjective and objective measures, limits precise comparisons between them.

## INTRODUCTION

Since the World Health Organization declared a global pandemic in March 2020, COVID-19 has become the focus of governmental decisions aimed at protecting the public and limiting the death toll. Schools, universities, and businesses have been forced to close to prevent the spread of the virus, limiting in-person relationships and substantially enhancing our digital dependence. The lifestyle and behavioral modifications that have emerged in response to the lockdowns have affected approximately 80% of the world's student population [1, 2].

The establishment of in-house quarantine led to a significant decrease in the amount of time spent engaged in outdoor activities, reduction in exposure to sunlight, and increase in time spent doing near work. These factors can enhance the risk of visual impairments, especially among school and university students encouraged to adopt a digital learning approach[3]. A growing dependence on e-learning and electronic devices has increased the incidence of visual fatigue, the onset and progression of myopia, dry eye, irregular astigmatism and acute concomitant esotropia among other ocular pathologies[4].

Even before the COVID-19 pandemic, an estimated 22.9% of the global population had myopia [5]. During the COVID-19 lockdown, the increased need for electronic devices, digital screens, and virtual classrooms might have caused previously healthy students to develop myopia, and faster progression in those who already had impaired vision. Obligatory confinement, intensive near work activities, and decreased exposure to sunlight can lead to visual fatigue, and may also enhance the risk of myopia, the most prevalent ocular condition[4].

1  
2  
3 Digital screen use is considered a common risk factor for dry eye, characterized by the  
4 deterioration of tear film quality. The risk of dry eye and symptom severity can be exacerbated by  
5 increased digital screen time[6,7,8]. Myopia and dry eye are potential visual health consequences  
6 associated with the increasing demand for children to engage in e-learning, which often starts at a  
7 very young age. To address this in the present systematic review, we sought to identify the impact  
8 of remote learning during the COVID-19 pandemic on visual health in school-age children.  
9  
10  
11  
12  
13  
14  
15  
16  
17

## 18 **METHODS**

### 19 **Search strategy and selection criteria**

20  
21  
22 In January 2022, we conducted a systematic review using three online databases. We used the  
23 following terms in PubMed: (<https://pubmed.ncbi.nlm.nih.gov/advanced/>) (((((vision) OR (visual  
24 impairment)) OR (myopia [MeSH Terms])) AND (COVID-19)) AND (lockdown)) AND (screen  
25 time); ScienceDirect: (<https://www.sciencedirect.com/search>) ((vision) OR (visual impairment)  
26 OR (myopia)) AND ((Covid-19 lockdown)) AND (screen time)); and Scopus:  
27 (<https://www.scopus.com>) ALL (vision OR ("visual" AND "impairment") OR myopia AND  
28 ("Covid-19" AND "lockdown") AND ("screen" AND "time")) AND (LIMIT-TO (SUBJAREA,  
29 "MEDI") OR LIMIT-TO (SUBJAREA, "COMP") OR LIMIT-TO (SUBJAREA, "NEUR") OR  
30 LIMIT-TO (SUBJAREA, "NURS") OR LIMIT-TO (SUBJAREA, "HEAL")). The ID  
31 CRD42022307107 was generated in the PROSPERO international prospective register of  
32 systematic reviews.  
33  
34  
35  
36  
37  
38  
39  
40  
41  
42  
43  
44  
45  
46  
47  
48  
49  
50

### 51 **Data collection**

1  
2  
3 A total of 326 articles were initially retrieved. Duplicates were removed, and the remaining articles  
4 were filtered by title and abstract following the preferred reporting items for systematic reviews  
5 and meta-analyses (PRISMA) guidelines (Figure 1 and Supplementary Table 1). Five researchers  
6 divided into two groups screened all of the articles, and 28 were selected for study inclusion. At  
7 weekly meetings, the authors analyzed the studies, debated disagreements, and double-checked all  
8 of the articles according to the inclusion and exclusion criteria. Articles were included if they  
9 described studies on the effects of remote learning during the COVID-19 lockdown on visual  
10 health in neurotypical children. They were excluded if they (I) were published before 2020; (II)  
11 studied the effects of remote learning during the COVID-19 lockdown on visual health in adults  
12 or university students; (III) assessed children with genetic syndromes or visual disabilities; (IV)  
13 were book chapters, editorials, or opinion pieces; (V) were published in languages other than  
14 Spanish, English, and French. Following this procedure, a total of 21 articles were included. These  
15 were evaluated using Joanna Briggs's checklist to guarantee study quality. Additionally, we  
16 conducted a risk of bias assessment using several tools. First, we used the National Institutes of  
17 Health (NIH) quality assessment tool for before-after (Pre-Post) studies with no control group [9].  
18 This instrument evaluates 12 major components with response options of yes/no/not  
19 applicable/cannot determine/not reported and gives a final quality rating of good, poor, or fair  
20 depending on the overall item response [9]. Second, we used the tool developed by Hoy et al. to  
21 assess cross-sectional studies by categorizing the article bias as low-, moderate-, or high-risk  
22 according to responses to 10 questions[10, 11]. Third, we used the tool proposed by Murad et al.  
23 to evaluate the methodological quality of case reports and case series. This tool appraises the  
24 selection, ascertainment, causality, and reporting bias of each article and makes an overall  
25 judgment about the methodology based on the responses to eight questions[12]. Finally, we used  
26  
27  
28  
29  
30  
31  
32  
33  
34  
35  
36  
37  
38  
39  
40  
41  
42  
43  
44  
45  
46  
47  
48  
49  
50  
51  
52  
53  
54  
55  
56  
57  
58  
59  
60



1  
2  
3 the Newcastle-Ottawa Scale for cohort studies to assess the selection, comparability, and outcome  
4 bias of the article by applying a qualitative star scale[9]. All domains evaluated using these tools  
5  
6 can be found in **Supplementary Table 2**.  
7  
8  
9

10  
11 Finally, we extracted data to obtain the following information: title, authors, digital object  
12 identifier number, objective, type of study, country in which the study was conducted, population  
13 (age and sample), presence of control group (age and sample), implemented test or evaluation  
14 methodology, main visual outcome, results, conclusion, and answers to the question “Did the  
15 COVID-19 lockdown impact visual health (improvement, deterioration, no change)? All  
16 information was synthesized using qualitative and quantitative synthesis (see the Results section).  
17  
18 Considering the heterogeneity among studies, we created subgroups for analysis, for example,  
19 studies regarding dry eye, refractive errors, clinical symptoms, and other clusters. All investigators  
20 participated in the data collection and synthesis.  
21  
22  
23  
24  
25  
26  
27  
28  
29  
30  
31

### 32 **Patient and public involvement:**

33  
34 This research was done without patient or public involvement. However, the findings will be  
35 shared at conferences attended by pediatric ophthalmologists and myopic patients who access  
36 ophthalmological services.  
37  
38  
39  
40  
41  
42

## 43 **RESULTS**

44  
45 We grouped the articles included in the review based on the main visual outcome associated with  
46 vision status and changes in vision in children during the COVID-19 lockdown. Overall, the main  
47 ocular effects observed were refractive errors (myopia), accommodation disturbances (esotropia)  
48 and visual symptoms (dry eye and fatigue) (**Table 1**). Among the studies, 16 were conducted in  
49  
50  
51  
52  
53  
54  
55  
56  
57  
58  
59  
60

Asia[13-28], 2 in Europe[29, 30], and 3 in America [31-32]. The risk of bias assessment revealed that all of the cross-sectional studies and case series had a low risk of bias. Three of the before-and-after studies had fair quality, and one had good quality.

**Table 1: Articles related to visual outcomes and the impact of remote learning during the COVID-19 pandemic.**

| Title                                                                        | Authors                      | Year | Type of study          | Country of the study | Results                                                                                                                                                                                                                                                                                                                                                                                          | ¿ Is there an effect of COVID-19 lockdown on visual health? |
|------------------------------------------------------------------------------|------------------------------|------|------------------------|----------------------|--------------------------------------------------------------------------------------------------------------------------------------------------------------------------------------------------------------------------------------------------------------------------------------------------------------------------------------------------------------------------------------------------|-------------------------------------------------------------|
| Comparison of Myopic Progression before, during, and after COVID-19 Lockdown | Chang, P. et al.             | 2021 | Before and after study | China                | Proportions of myopia and high myopia<br>Round 1: 48.0% and 1.3%<br>Round 2 : 53.2% and 1.9%<br>Round 3: 73.7% and 2.8%<br>Round 4: 67.9% and 2.7%<br><br>Mean rDSER:<br>Period 1: -0.030 D/month (95% confidence interval [CI], e0.031 to e0.029 D/month),<br>Period 2 (Lockdown): -0.074 D/month (95% CI, e0.075 to e0.074 D/month),<br>Period 3: 0.016 D/month (95% CI, 0.015e0.018 D/month). | Worsen                                                      |
| Impact of COVID-19 Home Confinement in Children's Refractive Errors          | Alvarez-Peregrina, C. et al. | 2021 | Cross-sectional        | Spain                | Spherical equivalent:<br>Average value in 2019: +0.66 ± 2.03 D<br>Average value in 2020: +0.48 ± 1.81 D<br><br>Children lifestyle during confinement:<br>56% changed the amount of time spent outdoors (CI 95%: 53–58)<br>47% (CI 95%: 45–50) of the cases, this time decreased (p < 0.001).                                                                                                     | Worsen                                                      |

|                                                                                                             |                               |      |                             |               |                                                                                                                                                                                                                                                                                                                                                                                                                                                                                                                                                                                                                                                                                                                                                                                                                                                                                                                                                       |         |
|-------------------------------------------------------------------------------------------------------------|-------------------------------|------|-----------------------------|---------------|-------------------------------------------------------------------------------------------------------------------------------------------------------------------------------------------------------------------------------------------------------------------------------------------------------------------------------------------------------------------------------------------------------------------------------------------------------------------------------------------------------------------------------------------------------------------------------------------------------------------------------------------------------------------------------------------------------------------------------------------------------------------------------------------------------------------------------------------------------------------------------------------------------------------------------------------------------|---------|
|                                                                                                             |                               |      |                             |               | <p>Children near vision during confinement:<br/>49% changed the amount of time they spent doing near-distance activities (CI 95%: 47–52).<br/>44% (CI 95%: 41–46; <math>p &lt; 0.001</math>) of the children increased near-distance activities.<br/>42% of the children changed the amount of time they spent with electronic devices (CI 95%: 40–45).<br/>39% (CI 95%: 37–42; <math>p &lt; 0.001</math>) of cases increase electronic use.</p> <p>Children who spent more time outdoors had higher SE in pre and post confinement (<math>p &lt; 0.001</math> and <math>p = 0.049</math>).</p>                                                                                                                                                                                                                                                                                                                                                       |         |
| Objective and subjective behavioral measures in myopic and non-myopic children during the covid-19 pandemic | Mirhajian moghadam, H. et al. | 2021 | Cross-sectional             | United States | <p>1. SUBJECTIVE MEASURES:<br/>-Significant interaction between session and day of the week.<br/>-Time outdoors: 2hours less during the 2020 summer of COVID-19 compared to typical summer before COVID-19. No significant differences between refractive error groups (<math>P = 0.20</math>).<br/>-Daily electronic device use: increased on weekdays and weekends during COVID-19 (<math>7.3 \pm 0.6</math> and <math>7.9 \pm 0.7</math> hours) compared to a typical summer (<math>4.9 \pm 0.5</math> and <math>6.1 \pm 0.5</math> hours, <math>P &lt; 0.001</math>) and to a typical school periods (<math>3.4 \pm 0.3</math> and <math>5.4 \pm 0.5</math> hours, <math>P &lt; 0.001</math>)</p> <p>2. OBJECTIVE MEASURES:<br/>-During COVID-19: myopic children had lower daily light exposure (<math>183.6 \pm 39.3</math> lux) than non-myopic children (<math>279.5 \pm 23.5</math> lux, <math>P = 0.04</math>) (<math>P = 0.09</math>).</p> | Unclear |
| Progression of Myopia in School-Aged Children after COVID-19 Home Confinement                               | Wang, J. et al.               | 2021 | prospective cross-sectional | China         | <p>Mean SER:<br/>-Annual screenings from 2015 to 2019: stable for all age groups.<br/>-SER decreased in 2020 compared with 2015-2019 in children aged 6 (<math>-0.32</math> D), 7 (<math>-0.28</math> D), and 8 (<math>-0.29</math> D) years.</p> <p>Prevalence of myopia:<br/>-2020: 21.5% at 6 years, 26.2% at 7 years, and 37.2% at 8 years.<br/>-2015-2019: 5.7% at 6 years in 2019, 16.2% at 7 years in 2018, and 27.7% at 8 years in 2018.</p>                                                                                                                                                                                                                                                                                                                                                                                                                                                                                                  | Worsen  |
| Survey on the Progression of Myopia in Children and Adolescents in Chongqing During COVID-19 Pandemic       | Wang, W. et al.               | 2021 | Before and after study      | China         | <p>Myopia prevalence among teenagers:<br/>-2019: 44.62%<br/>-2020: 55.02% .<br/>Average progression rate: 10.49%.<br/>Spherical equivalent:<br/>-2019: <math>-1.64 \pm 5.49</math> D<br/>-2020: <math>-1.94 \pm 2.13</math> D<br/>Myopia percentage was 84.89% in high school, 73.39% in junior school and 39.27% in primary.</p>                                                                                                                                                                                                                                                                                                                                                                                                                                                                                                                                                                                                                     | Worsen  |
| The effect of home education on myopia progression in children during the                                   | Aslan, F. et al.              | 2021 | Before and after study      | Turkey        | <p>Mean duration spent in front of the screen was <math>5.77 \pm 1.34</math> h/day<br/>The mean SE of the refractive values was:<br/>-2016: <math>-1.14 \pm 0.66</math> D</p>                                                                                                                                                                                                                                                                                                                                                                                                                                                                                                                                                                                                                                                                                                                                                                         | Worsen  |

|                                                                                                             |                                                                                                       |                    |      |                        |       |                                                                                                                                                                                                                                                                                                                                                                                                                                                                                                                                                                                                                                                                                                                                                                                                                                                   |                  |
|-------------------------------------------------------------------------------------------------------------|-------------------------------------------------------------------------------------------------------|--------------------|------|------------------------|-------|---------------------------------------------------------------------------------------------------------------------------------------------------------------------------------------------------------------------------------------------------------------------------------------------------------------------------------------------------------------------------------------------------------------------------------------------------------------------------------------------------------------------------------------------------------------------------------------------------------------------------------------------------------------------------------------------------------------------------------------------------------------------------------------------------------------------------------------------------|------------------|
| 1<br>2<br>3<br>4<br>5<br>6<br>7<br>8<br>9<br>10<br>11<br>12<br>13<br>14<br>15<br>16<br>17<br>18<br>19<br>20 | COVID-19 pandemic                                                                                     |                    |      |                        |       | <p>-2017: <math>-1.47 \pm 0.82</math> D<br/> -2018: <math>-0.45 \pm 0.91</math> D<br/> -2019: <math>-1.99 \pm 1.04</math> D<br/> -2020: <math>-2.7 \pm 1.21</math> D</p> <p>Myopic progression of <math>0.71 \pm 0.46</math> D in 2020<br/> The mean myopic progression 2020:<br/> - Overall: <math>0.71 \pm 0.46</math> D<br/> - In children who spent time outside in the daylight for 2 h a day: <math>0.55 \pm 0.42</math> D<br/> - In children with less outside time: <math>0.82 \pm 0.45</math> D<br/> (<math>p = 0.003</math>)</p> <p>The myopia progression in 2020 was slow (<math>0.31 \pm 0.2</math> D) in 42.6% of subjects, moderate (<math>0.82 \pm 0.14</math> D) in 39.1% and rapid in <math>1.42 \pm 0.29</math> D in 18.3%.</p> <p>No correlation was found between the 2020 progression and the daily digital device use.</p> |                  |
| 21<br>22<br>23<br>24<br>25<br>26<br>27<br>28                                                                | The impact of COVID-19 home confinement on axial length in myopic children undergoing orthokeratology | Lv, H. et al.      | 2022 | Before and after study | China | <p>Monthly axial length growth:<br/> -After confinement: <math>0.023 \pm 0.019</math> mm/month<br/> -During confinement: <math>0.018 \pm 0.021</math> mm/month, negatively related (<math>P = 0.002</math>).<br/> -Before confinement: <math>0.014 \pm 0.016</math> mm/month</p> <p>The monthly axial length growth after and before confinement was not significantly different (<math>P = 0.333</math>)</p>                                                                                                                                                                                                                                                                                                                                                                                                                                     | Remains the same |
| 29<br>30<br>31<br>32<br>33<br>34<br>35<br>36<br>37<br>38<br>39<br>40<br>41                                  | The Impact of Study-at-Home During the COVID-19 Pandemic on Myopia Progression in Chinese Children    | Dandan, M. et al.  | 2022 | Cohort                 | China | <p>Myopia progression: <math>p &lt; 0.001</math>.<br/> -In exposed group: <math>-0.83 \pm 0.56</math> D<br/> -In Control group: <math>-0.28 \pm 0.54</math> D</p> <p>In the exposed group, children had a larger change in myopia progression in the follow-up period (<math>-0.83 \pm 0.56</math> D) compared to the baseline period (<math>-0.33 \pm 0.46</math> D; <math>p &lt; 0.001</math>).</p> <p>Increment on near work time from <math>2.96 \pm 1.05</math> hours per day to <math>4.33 \pm 1.04</math> hours per day (<math>p &lt; 0.001</math>) during COVID-19.<br/> Decrease on outdoor activities from <math>1.84 \pm 1.43</math> hours per day to <math>0.98 \pm 1.01</math> hours per day (<math>p &lt; 0.001</math>) during COVID-19.</p>                                                                                        | Worsen           |
| 42<br>43<br>44<br>45<br>46<br>47<br>48<br>49<br>50<br>51<br>52<br>53                                        | COVID-19 Quarantine Reveals That Behavioral Changes Have an Effect on Myopia Progression.             | Liangde, X. et al. | 2021 | Before and after study | China | <p>Myopia prevalence:<br/> -June 2019: 52.89% (95% confidence interval [CI], 52.79%-52.99%)<br/> -December 2019: 53.9%(95% CI, 53.79%-54.01%).<br/> -June 2020: 59.35% (95% CI, 59.24%-59.46%)</p> <p>Increase in myopia prevalence:<br/> -Grades 1 to 6: 8.54%<br/> -Grades 7 to 12: 4.32%</p> <p>Half-year incidence rate of myopia:<br/> -Before COVID-19: 8.5%<br/> -After COVID-19: 13.62% (<math>P &lt; 0.001</math>)</p>                                                                                                                                                                                                                                                                                                                                                                                                                   | Worsen           |
| 54<br>55<br>56                                                                                              | Rates of Myopia Development in                                                                        | Yin, H. et al.     | 2021 | Cohort                 | China | The mean AL was 0.11 mm (95% CI, 0.05-0.16).                                                                                                                                                                                                                                                                                                                                                                                                                                                                                                                                                                                                                                                                                                                                                                                                      | Worsen           |

|                                                                                        |                                                                                                                                                               |                         |      |                 |               |                                                                                                                                                                                                                                                                                                                                                                                                                                                                                                                                                                                                                                                                                 |        |
|----------------------------------------------------------------------------------------|---------------------------------------------------------------------------------------------------------------------------------------------------------------|-------------------------|------|-----------------|---------------|---------------------------------------------------------------------------------------------------------------------------------------------------------------------------------------------------------------------------------------------------------------------------------------------------------------------------------------------------------------------------------------------------------------------------------------------------------------------------------------------------------------------------------------------------------------------------------------------------------------------------------------------------------------------------------|--------|
| 1<br>2<br>3<br>4<br>5<br>6<br>7<br>8<br>9<br>10<br>11                                  | Young Chinese Schoolchildren During the Outbreak of COVID-19                                                                                                  |                         |      |                 |               | Exposed group:<br>-Myopic shift of SER: 0.36 D (95% CI, 0.32-0.41; P < .001) and 0.08 mm (95% CI, 0.06-0.10; P < .001) greater AL elongation.<br>-Incidence of myopia: 7.9% (95% CI, 5.1-10.6; P < .001) higher.<br>-Prevalence of myopia: 219 of 1054 students (20.8%) was 7.5% (95% CI, 4.3-10.7) higher than in the nonexposure group (141 of 1060 students [13.3%])                                                                                                                                                                                                                                                                                                         |        |
| 12<br>13<br>14<br>15<br>16<br>17<br>18<br>19<br>20                                     | Impact of online classes and home confinement on myopia progression in children during COVID-19 pandemic: Digital eye strain among kids (DESK) study 4        | Mohan, A. et al.        | 2022 | Cross-sectional | India         | Myopia progression report:<br>-Before COVID-19: 45.9% of participants<br>-During the COVID-19: 62.5% of participants.                                                                                                                                                                                                                                                                                                                                                                                                                                                                                                                                                           | Worsen |
| 21<br>22<br>23<br>24<br>25<br>26<br>27<br>28                                           | Acute Acquired Concomitant Esotropia From Excessive Application of Near Vision During the COVID-19 Lockdown                                                   | Vagge, A. et al.        | 2021 | Case series     | Italy         | 1. A 4-year-old girl with ACE of 35 prism diopters managed with glasses. She used the tablet around 8h/d<br>2. A 16-year-old boy with ACE of 30 prism diopters managed with Fresnel prism. Computer 8h/d<br>3. A 16-year-old boy with ACE of 20 prism diopters managed with Fresnel prism. Computer 10h/d<br>4. An 8-year-old girl with ACE of 25 prism diopters managed conservatively. She used the tablet around 8h/d                                                                                                                                                                                                                                                        | Worsen |
| 29<br>30<br>31<br>32<br>33<br>34<br>35<br>36<br>37<br>38<br>39<br>40                   | Binocular accommodation and vergence dysfunction in children attending online classes during the COVID-19 pandemic: digital eye strain in kids (DESK) study-2 | Mohan, A. et al.        | 2021 | Cross-sectional | India         | Mean CISS scores:<br>-In children using devices less than 4/hours/day: 21.73 ± 12.81<br>-In children using digital devices for 4 hours/day or more: 30.34 ± 13.0 for (P = .019).<br><br>Mean values of near exophoria (P = .03), NFV (P = .02), NRA (P = .057), and AA (P = .002)<br><br>Spearman correlation between CISS score and the duration of online classes: weak linear association (coefficient rs = 0.39, P = .007).                                                                                                                                                                                                                                                 | Worsen |
| 41<br>42<br>43<br>44<br>45<br>46<br>47<br>48<br>49<br>50<br>51<br>52<br>53<br>54<br>55 | The visual consequences of virtual school: acute eye symptoms in healthy children                                                                             | Hamburger, J.,L. et al. | 2022 | cross-sectional | United States | CISS score:<br>-Before school: Mean of 5.17 and median of 4<br>-After school: Mean of 9.82 and a median of 7.5 (mean change, 4.65; median change 2; P < 0.001)<br>-Linear regression analysis of change in total CISS score from before to after school versus hours spent in virtual school: score increase of 1.243 per hour of virtual school. (P = 0.0282)<br><br>The asthenopia score:<br>-Before school: Mean of 1.58 and total median of 1<br>-After school: Mean of 2.74 and a median of 2 (mean change, 1.15, median change, 1; P < 0.001)<br>-Linear regression analysis of change in total asthenopia score from before to after school versus actual hours spent in | Worsen |

1  
2  
3  
4  
5  
6  
7  
8  
9  
10  
11  
12  
13  
14  
15  
16  
17  
18  
19  
20  
21  
22  
23  
24  
25  
26  
27  
28  
29  
30  
31  
32  
33  
34  
35  
36  
37  
38  
39  
40  
41  
42  
43  
44  
45  
46  
47  
48  
49  
50  
51  
52  
53  
54  
55  
56  
57  
58  
59  
60

|                                                                                                                                                                                                |                         |      |                 |               |                                                                                                                                                                                                                                                                                                                                                                                              |        |
|------------------------------------------------------------------------------------------------------------------------------------------------------------------------------------------------|-------------------------|------|-----------------|---------------|----------------------------------------------------------------------------------------------------------------------------------------------------------------------------------------------------------------------------------------------------------------------------------------------------------------------------------------------------------------------------------------------|--------|
|                                                                                                                                                                                                |                         |      |                 |               | virtual school: score increase of 0.280 per hour of virtual school. (P = 0.0807).                                                                                                                                                                                                                                                                                                            |        |
| Series of cases of acute acquired comitant esotropia in children associated with excessive online classes on smartphone during COVID-19 pandemic; digital eye strain among kids (DESK) study-3 | Mohan, A. et al.        | 2021 | Case series     | India         | -5/8 subjects were emmetropic, 1 myopic, 1 pseudomyopic, 1 mild hyperopic.<br>-Average use of device: 4.6 + 0.7 hours per day at an average of 5.5 inches from the screen.<br>-Average angle deviation for near with corrected vision in esotropia: 48.1 ± 16.4 PD<br>- 7/8 children reported horizontal diplopia.                                                                           | Worsen |
| Relationship between screen time and dry eye symptoms in pediatric population during the COVID-19 pandemic                                                                                     | Elhusseiny, A.M. et al. | 2021 | Cross-sectional | Egypt         | m-SPEED questionnaire score:<br>-Pre-COVID-19: 0.83 ± 2.04 (P < 0.001).<br>-COVID-19 2020: 3.9 ± 4.53 --> higher in urban areas (4.68 ± 4.87) vs. rural areas ((2.97 ± 3.69) (P<0.001).<br><br>Screen time:<br>-Male sex: associated with greater ST (Mean difference of 0.6 ± 0.31 h per day (P=0.047)).<br>-Development of DED :in association with prolonged ST.                          | Worsen |
| New Indicator of Children's Excessive Electronic Screen Use and Factors in Meibomian Gland Atrophy                                                                                             | Cremers, S.,L. et al.   | 2021 | Cross-sectional | United States | CHESUD:<br>-Four or more hours: 86% OF MGA cases<br>-Eight or more hours: 50%<br><br>Severe MGA related to:<br>- Less outdoor time<br>- Higher meibography scores (<0.01)<br><br>CHESUD positively association with the increase in combined meibography scores (OR: 2.81; 95% confidence interval [CI], 1.66 to 4.77)                                                                       | Worsen |
| Prevalence and risk factor assessment of digital eye strain among children using online e-learning during the COVID-19 pandemic: Digital eye strain among kids (DESK study-1)                  | Mohan, A. et al.        | 2021 | Cross-sectional | India         | During the COVID-19:<br>-Mean duration of digital device use: 3.9 ± 1.9 h<br>-Percentage of children using devices for >5 hr: 36.9%<br>Before COVID:<br>-Mean duration of digital device use: 1.9 ± 1.1 h<br>-Percentage of children using devices for >5 hr: 1.8%<br><br>Survey report:<br>-Eyesight worsened because of the online classes: 49.76%<br>- Overall prevalence of DES: 50.23%. | Worsen |
| Impact of E-schooling on digital eye strain in Coronavirus Disease Era: A survey of 654 students                                                                                               | Gupta, R. et al.        | 2021 | Cross-sectional | India         | Asthenopic and dry eye symptoms:<br>-Heaviness of eyelids:79.7%, Eye redness: 69.1%, Eye strain: 68.2%, Blinking: 57.8%, Blurred vision: 56.9%, Light sensitivity: 56%, Stinging: 47.1%, and Burning: 46.3%.<br><br>Digital device use:<br>< 4hours: 30 (12.5%) children, 5-6hours: 13 (6.6%) children,                                                                                      | Worsen |

|                                                                                                                                                          |                    |      |                 |       |                                                                                                                                                                                                                                                                                                                                                                                                                                                                                                                                                                                                                                                         |        |
|----------------------------------------------------------------------------------------------------------------------------------------------------------|--------------------|------|-----------------|-------|---------------------------------------------------------------------------------------------------------------------------------------------------------------------------------------------------------------------------------------------------------------------------------------------------------------------------------------------------------------------------------------------------------------------------------------------------------------------------------------------------------------------------------------------------------------------------------------------------------------------------------------------------------|--------|
|                                                                                                                                                          |                    |      |                 |       | > 6 hours: 4 (2.3%) children, Had not reported any AS (P = 0.001)<br><br>Computer vision syndrome score:<br>CVS score was statistically significantly lower in the 5–7-year group vs. 11–16 year group [P = 0.004].                                                                                                                                                                                                                                                                                                                                                                                                                                     |        |
| Prevalence of Self-Reported Symptoms of Computer Vision Syndrome and Associated Risk Factors among School Students in China during the COVID 19 Pandemic | Li, R. et al.      | 2021 | cross-sectional | China | 53% used glasses, 47% myopia, 2.9% myopia, 2.1% hyperopia, 13% astigmatism, 0.8% amblyopia, 0.7% anisometropia, 1.5% strabismus, 2.5% conjunctivitis, 1.7% previous eye surgery.<br><br>Mean screen time 4.6h/day, 1.2 h/day on outdoor activities, 9.9 h/day on sleep.<br><br>Self-reported symptoms: 13% double vision, 48% itching, eye dryness.<br>-Mild intensity: 1.4% colored halos around objetcs, 8.8% eye dryness, 0.3% double vision, 3.2% neck or shoulder pain<br>-Moderate intensity: 1.3% colored halos around objetcs, 7.8% dry eyeness<br>-Severe intensity: 0.3% double vision, 2.7% neck or shoulder pain or feeling sight worsening | Worsen |
| Contribution of Total Screen/Online-Course Time to Asthenopia in Children During COVID-19 Pandemic via Influencing Psychological Stress                  | Lin, J., Z. et al, | 2021 | cross-sectional | China | 63.1% had myopia, 36% had astigmatism, and 12.1% reported asthenopia.<br><br>Students with asthenopia had longer screen/online-course time and less daily rest time. A 100-h increment were associated with an increased 9% risk of asthenopia [odds ratio (OR) = 1.09] and 11% (OR = 1.11).                                                                                                                                                                                                                                                                                                                                                            | Worsen |

1  
2  
3 1 We identified 11 articles that examined refractive errors related to virtual learning during the  
4  
5 2 COVID-19 lockdown. Most of these examined myopia progression as the main visual outcome.  
6  
7 3 Eight studies reported that myopia worsened throughout the COVID-19 lockdown in children and  
8  
9 4 teenagers between 5 and 18 years old[15, 17, 19, 21, 22, 23, 24, 27]. One study reported a  
10  
11 5 significant decrease in spherical equivalent refraction (SER) in children with hyperopia and  
12  
13 6 emmetropia (see Table 2. Glossary) [30]. Interestingly, a study evaluating axial length in myopic  
14  
15 7 children undergoing orthokeratology (see Table 2. Glossary) did not find any change in myopia  
16  
17 8 progression after lockdown [21]. Furthermore, one study focused on risk factors and behavioral  
18  
19 9 changes during the COVID-19 lockdown in terms of myopia found that all children had changes  
20  
21 10 in near-work time, electronic device use, and outdoor time. However, myopic children had a  
22  
23 11 significantly lower levels of daily light exposure compared with non-myopic children[32]. The  
24  
25 12 monthly extent of myopia progression during the COVID-19 lockdown was reported to be  $-0.074$   
26  
27 13 D/month, which corresponds to an annual progression in 2020 of  $-0.71 \pm 0.46$  D[15, 20].  
28  
29 14 Furthermore, rapid myopia progression was reported in a sample of 133 school students.  
30  
31 15 Specifically, the percentage of children with reported annual progression for whom progression  
32  
33 16 was rapid increased from 10.5% before to 45.9 % during the pandemic [27]. SER was estimated  
34  
35 17 in several studies. In 2020, the mean SER in myopic children and teenagers was between  $-1.94 \pm$   
36  
37 18  $2.13$  D and  $-2.7 \pm 1.21$  D, and this was significantly lower than in 2019 ( $-1.64 \pm 5.49$  D and  $-1.99$   
38  
39 19  $\pm 1.04$  D,  $p < 0.001$ )[19, 20]. Similarly, there was a significant decrease in the mean SER of  
40  
41 20 hyperopic and emmetropic children from 2019 to 2020, i.e.,  $0.66 \pm 2.03$  D (2019) and  $0.48 \pm 1.81$   
42  
43 21 D (2020), respectively,  $p \leq 0.001$ [30]. Finally, studies examining virtual learning during the  
44  
45 22 COVID-19 lockdown as an exposure risk factor found a higher incidence of myopia in children  
46  
47 23 who engaged in virtual learning ( $p < 0.01$ )[22-24].  
48  
49  
50  
51  
52  
53  
54  
55  
56  
57  
58  
59  
60



24  
25 Four studies reported accommodation and vergence dysfunction (see Table 2. Glossary) secondary  
26 to near work and increased screen-use time[13, 26, 29, 33]. Two studies focused on binocular  
27 accommodation in a sample of 156 children aged 10 to 17 years old and reported a significant  
28 increase in convergence insufficiency symptom survey (CISS) scores after exposure to longer  
29 screen time during online classes[11, 29]. The other two were case series of children who  
30 developed acquired concomitant esotropia and vergence abnormalities secondary to the excessive  
31 use of digital devices[27, 29].

32 Emerging visual symptoms were identified in six studies with populations ranging from 8 to 20  
33 years old. The studies reported worsening of visual symptoms such as vision impairment,  
34 asthenopia, dryness, scratchiness, headache, eye redness, eye strain, and light sensitivity, among  
35 others[14, 16, 18, 25, 26, 33].

36 Overall, the results of qualitative data syntheses showed a negative effect of the COVID-19  
37 lockdown on visual health in children. Only one of the articles included did not report a deleterious  
38 impact of the lockdown on vision[21].

## 39 **DISCUSSION**

40 Most of the studies included in this systematic review showed some degree of worsening in visual  
41 health in children exposed to virtual learning strategies during the COVID-19 lockdown. The  
42 majority of the articles focused on myopia development and progression, and reported a faster  
43 onset and progression following the beginning of the lockdown. Also, prolonged exposure to  
44 screens was associated with worsened ocular symptoms such as eye strain, blurred vision, and  
45 redness, as well as an increase in the rate of dry eye, which is traditionally considered to be  
46 uncommon in the pediatric population.

## 47 **Refractive errors**

48 The COVID-19 lockdown impacted the behavior and daily life of children and teenagers, resulting  
49 in increased digital time, near work, and decreased outdoor time[34]. It is estimated that close to  
50 1.37 billion students worldwide switched to a digital or e-learning school modality during the  
51 lockdown[34]. These changes have been related to an increase in myopia incidence and  
52 progression[34]. First, the relationship between near work, especially near reading, and myopia  
53 was well established before the COVID-19 pandemic, as stated in the Collaborative Longitudinal  
54 Evaluation Of Ethnicity And Refractive Error Study[34, 35]. Second, several studies have focused  
55 on screen time and its association with myopia development[34, 36, 37]. Third, outdoor time has  
56 been considered a protective factor against myopia onset. He et al. showed a 23% reduction in  
57 myopia incidence after 40 minutes of outdoor time daily[34, 38].

58  
59 During the COVID-19 pandemic in 2020, Mirhajianmoghadam et al. assessed subjective and  
60 objective measures in 14 myopic and 39 non-myopic children in the USA[32]. Initially, parents  
61 completed the University of Houston Near Work, Environment, Activity, and Refraction survey  
62 in three sessions. The first session included questions related to summer 2020, which was during  
63 the COVID-19 pandemic. The second session served to collect data about a typical school period  
64 before the COVID-19 pandemic, and the goal of the third session was to collect data about a typical  
65 summer period before the pandemic. Later, the investigators used an actigraph device to measure  
66 physical activity, sleep, and ambient illumination exposure (time spent outdoors) in children for  
67 10 days. The results indicated that all of the children spent less time outdoors during the summer  
68 of the pandemic (2020) compared with before the lockdown and showed an increase in daily  
69 electronic device use. Furthermore, myopic children had less daily light exposure ( $183.6 \pm 39.3$

1  
2  
3 70 lux) and spent less time outdoors (0.2 hours per day) during COVID-19 compared with non-  
4  
5 71 myopic children ( $279.5 \pm 23.5$  lux,  $P = 0.04$ )[32].  
6  
7  
8 72

9  
10 73 The authors of several previous studies have proposed that increased time spent using digital  
11  
12 74 devices is associated with decreased time spent outdoors and impaired retinal dopamine release,  
13  
14 75 which is normally stimulated by daylight exposure. This suppresses axial expansion of the eye,  
15  
16 76 preventing myopia progression[39, 40]. For instance, Wu et al. reported that children who spent  
17  
18 77 more than 11 hours a week outdoors had a 53% decrease in myopia progression[41], and Ip et al.  
19  
20 78 reported an increased incidence of progression in children living in apartment buildings compared  
21  
22 79 with those living in detached houses[42]. Additionally, Xu et al. found that the amount of time  
23  
24 80 spent online was significantly positively associated with an increased incidence of myopia and  
25  
26 81 progression in students[23]. However, not all studies have shown this correlation[20]. Aslan et al.  
27  
28 82 reported that myopia advancement in 2020 was mainly slow ( $0.31 \pm 0.2$  D) in most of the children  
29  
30 83 evaluated (49 subjects), followed by moderate progression in 45 children ( $0.82 \pm 0.14$  D). The  
31  
32 84 authors found no correlation between myopia progression and digital device time or glasses  
33  
34 85 use[20]. Thus, the relationship between myopia progression and digital device use requires further  
35  
36 86 investigation.  
37  
38  
39  
40  
41  
42 87

43  
44 88 The studies by Mirhajianmoghadam et al. and Aslan et al. support findings of myopia progression  
45  
46 89 during the COVID-19 lockdown. For example, Chang et al. compared myopic progression before,  
47  
48 90 during, and after the COVID-19 lockdown in 44,187 students in China by assessing non-  
49  
50 91 cycloplegic autorefraction and the SER[15]. Four evaluation rounds separated by 6 months during  
51  
52 92 2019 and 2020 indicated a transitory period of accelerated myopic progression in children that  
53  
54  
55  
56  
57  
58  
59  
60

1  
2  
3 93 reversed after the lockdown. The mean SER during the pre-pandemic assessment was  $-0.030$   
4  
5 94 D/month, shortly after the lockdown was  $-0.074$  D/month, and later during the lockdown was  
6  
7  
8 95  $0.016$  D/month. The proportion of myopic participants was 48% before the lockdown, 45.2% at a  
9  
10 96 second assessment before the lockdown, 73.7% shortly after the lockdown, and 67.9% later after  
11  
12 97 the lockdown during round 1, 2, 3, and 4, respectively. The authors considered the influence of  
13  
14 98 accommodative spasms and structural changes related to restricted outdoor time, increased screen  
15  
16 99 time, and limited indoor space to be the leading cause of the progression. Moreover, they found  
17  
18  
19 100 that younger children were at a higher risk of myopic progression during the lockdown because  
20  
21 101 their lifestyle changes were strongly associated with reduced light exposure, and accordingly,  
22  
23  
24 102 reduced retinal dopamine levels[15].  
25

26 103  
27  
28 104 This is concordant with the findings of Wang et al., who reported a substantial decrease in the SER  
29  
30 105 after COVID-19 home confinement, especially for children aged 6 ( $-0.32$  D), 7 ( $-0.28$  D), and 8  
31  
32 106 ( $-0.29$  D) years,  $p$ -value  $< 0.05$ [17]. Furthermore, they found myopia development to occur earlier  
33  
34 107 in girls than boys. The prevalence of myopia appeared to be approximately 3 times higher in 2020  
35  
36 108 than in other years for children aged 6 years, 2 times higher for children aged 7 years, and 1.4  
37  
38 109 times higher for those aged 8 years. This led the authors to hypothesize that younger children are  
39  
40 110 more sensitive to environmental changes than older children[17]. Furthermore, Wang et al.  
41  
42 111 reported a prevalence of myopia of 39.27% in primary school students, 73.39% in junior school  
43  
44 112 students, and 84.89% in high school students, identifying an increase in the rate of myopia among  
45  
46  
47 113 teenagers in 2020 (55.02%) compared with that in 2019 (44.64%)[19].  
48  
49

50  
51 114  
52  
53  
54  
55  
56  
57  
58  
59

1  
2  
3 115 Lv et al. investigated the potential impacts of home confinement on myopia progression from the  
4  
5 116 perspective of axial growth length in children undergoing orthokeratology treatment [21]. They  
6  
7 117 found a monthly axial growth length of  $0.023 \pm 0.019$  mm/month,  $0.018 \pm 0.021$  mm/month, and  
8  
9 118  $0.014 \pm 0.016$  mm/month before, during, and after home confinement, respectively. However, the  
10  
11 119 monthly axial growth length before confinement was not significantly different from that after  
12  
13 120 confinement ( $P = 0.333$ ), although age was negatively associated with the axial length growth rate  
14  
15 121 during confinement in myopic children [21]. This coincides with the findings of a previous meta-  
16  
17 122 analysis that suggested that orthokeratology decreases the rate of myopia progression in children  
18  
19 123 [43].

20  
21  
22  
23 124 In contrast, Alvarez-Peregrina et al. did not find an increase in the prevalence of myopia among  
24  
25 125 children between 2019 and 2020[30]. However, they observed that the percentage of hyperopes  
26  
27 126 decreased, and the percentage of emmetropes increased ( $p < 0.001$ ). The average SE value in 2019  
28  
29 127 was  $+0.66 \pm 2.03$  D, compared with  $+0.48 \pm 1.81$  D in 2020 ( $p \leq 0.001$ ). This decrease was  
30  
31 128 significant in children aged 5 years. Additionally, 47% (CI 95%: 45–50) of children spent less time  
32  
33 129 outdoors in 2020 versus 2019 ( $p < 0.001$ ). Children who spent more time outdoors had higher SE  
34  
35 130 values both pre- and post-confinement ( $p < 0.001$  and  $p = 0.049$ )[26]. Even though Alvarez-  
36  
37 131 Peregrina et al. did not demonstrate myopia progression, a reduction in SER is a strong predictive  
38  
39 132 factor for myopia in emmetropic and hyperopic children, as indicated by the Wenzhou Medical  
40  
41 133 University Essilor Progression and Onset of Myopia (WePrOM) study[44].  
42  
43  
44  
45  
46  
47

#### 48 134 **Accommodation and vergence disturbances**

49  
50  
51 135 A longer duration of digital device use requires more accommodative effort, and consequently,  
52  
53 136 increases the chance of asthenopia symptoms and dysfunctional accommodation and vergence (see  
54  
55 137 Table 2. Glossary). Mohan et al. studied the effects of online classes during the COVID-19  
56  
57  
58  
59  
60

1  
2  
3 138 pandemic, and considered the time spent in online classes and using digital devices such as TV,  
4  
5 139 video game systems, and smartphones. According to the CISS survey, followed by evaluations by  
6  
7  
8 140 an optometrist and pediatric ophthalmologist, 36 out of 46 examined children had symptoms of  
9  
10 141 convergence insufficiency. However, children who attended online classes for less than 4  
11  
12 142 hours/day exhibited fewer symptoms than those who attended online classes for more than 4 hours  
13  
14  
15 143 every day. Furthermore, near exophoria, near point convergence, positive fusional weakness, and  
16  
17 144 accommodation excess were more frequent in children exposed to longer online classes[13].  
18  
19

20 145 Similarly, Hamburger et al. evaluated ocular symptoms in 110 children who attended virtual school  
21  
22 146 during the COVID-19 pandemic. They found that 61% of the children reported a significant  
23  
24  
25 147 increase in convergence insufficiency, as evidenced by a higher CISS score after attending online  
26  
27 148 classes[33].  
28  
29

30 149 Vagge et al. reported four cases of children between 4 and 16 years old who developed acute  
31  
32 150 acquired concomitant esotropia after intense digital device use during the COVID-19  
33  
34  
35 151 lockdown[29]. All of the children experienced acute onset diplopia (see Table 2. Glossary) after  
36  
37 152 more than 8 hours per day spent looking at digital screens. Ophthalmologic examination reported  
38  
39  
40 153 manifest esotropia from 20 to 35 prism diopters (PD) at far and near distances in all four patients.  
41  
42 154 Two out of the four children presented bilaterally cycloplegic refraction of +1.00 to +2.00 diopter  
43  
44 155 sphere. One of them presented cycloplegic refraction of -2.50 in the right eye and -2.25 in the left  
45  
46 156 eye, and another presented -0.5 bilaterally[29]. Some studies have suggested that digital device-  
47  
48  
49 157 induced esotropia is associated with excessive application of near vision, as well as dynamic  
50  
51 158 activation of the medial rectus muscles when exposed to longer periods of digital screen time. This  
52  
53  
54 159 may affect the near vision triad, i.e., the accommodation-convergence reflex: convergence of both  
55  
56  
57  
58  
59

1  
2  
3 160 eyes, contraction of the ciliary muscle resulting in a change of lens shape (accommodation), and  
4  
5 161 pupillary constriction[29, 45, 46].  
6  
7

## 8 9 162 **Visual symptoms**

10  
11  
12 163 The increase in digital device use associated with the COVID-19 lockdown and remote learning  
13  
14 164 has precipitated a rise in dry eye symptoms and asthenopia. Hamburger et al. reported a significant  
15  
16 165 increase in asthenopia symptoms after online classes with discomfort, fatigue, and impaired vision  
17  
18 166 as dominant symptoms. Moreover, an increased asthenopia score was identified after online  
19  
20 167 classes in more than half of the children evaluated [33]. Likewise, Li et al. identified a positive  
21  
22 168 association between screen time and the risk of asthenopia in approximately 25,000 students aged  
23  
24 169 8 to 20 years old, and attributed a higher risk of asthenopia to conditions such as myopia,  
25  
26 170 astigmatism, and mechanical factors like distance from the screen[25].  
27  
28  
29

30  
31 171 Elhusseiny et al. reported a significant increase in symptoms such as eye dryness, grittiness, and  
32  
33 172 scratchiness associated with prolonged exposure to digital screens for education and leisure  
34  
35 173 purposes in 403 children aged 10 to 18 years[18]. Similarly, Mohan et al. identified longer screen  
36  
37 174 time during the COVID-19 lockdown compared with the pre-COVID era in 217 children, of which  
38  
39 175 almost half attended online classes[14]. More than a third of the evaluated children used digital  
40  
41 176 devices for over 5 hours a day, and 50.23% manifested dry eye with itching and headache as  
42  
43 177 predominant symptoms.  
44  
45  
46  
47

48  
49 178 Gupta et al. evaluated 654 students between 5 and 18 years old using the Rasch-based Computer-  
50  
51 179 Vision Symptom Scale[16]. The authors reported a significant increase in average digital device  
52  
53 180 exposure during confinement, particularly smartphone, which was greater than 5 hours/day. Visual  
54  
55 181 symptoms in the children were eye redness, eye strain, blurred vision, light sensitivity, and  
56  
57  
58  
59

1  
2  
3 182 heaviness of eyelids [16]. Furthermore, Li et al. identified a higher risk of computer vision  
4  
5 183 syndrome in children with myopia with and without correction, astigmatism, fewer outdoor  
6  
7  
8 184 activities, and prolonged screen time[26].  
9

10  
11 185 The relationship between digital screen time and dry eye has already been described in both adults  
12  
13 186 and children, as well as before the global COVID-19 pandemic[47-50]. Changes in blinking  
14  
15 187 dynamics and ocular surface abnormalities are some of the consequences that arise from intense  
16  
17  
18 188 screen exposure. Regarding ocular surface measures, longer screen time can decrease blinking  
19  
20 189 frequency and completeness, resulting in reduced tear break-up time and tear volume, as well as  
21  
22 190 changes in tear lipid composition[6, 51]. This means that a longer exposure to digital devices can  
23  
24  
25 191 enhance the deterioration of tear film quality, and thus increase the risk of developing dry eye  
26  
27 192 symptoms[6].  
28

29  
30 193 A main limitation of this study is the inclusion of articles with different study designs, as it is  
31  
32 194 difficult to compare them quantitative and qualitatively. Moreover, the evidence reported in the  
33  
34 195 selected studies was obtained using distinct evaluation methods, from symptom surveys to detailed  
35  
36  
37 196 ophthalmologic examinations, influencing the objectiveness of the conclusions obtained. Given  
38  
39 197 that most of the studies were developed specifically in Asian countries, extrapolations to other  
40  
41  
42 198 parts of the world should be made with caution.  
43

## 44 45 199 **Conclusions**

46  
47  
48 200 The changes in habits and lifestyles as a result of the COVID-19 pandemic have severely impacted  
49  
50 201 eye health in children. Children attending classes as part of a remote learning strategy had more  
51  
52  
53 202 rapid myopia progression, increased frequency of dry eye and visual fatigue symptoms, and  
54  
55 203 exhibited signs of vergence and accommodation disturbances such as acute acquired concomitant  
56  
57  
58  
59  
60



1  
2  
3 204 esotropia and convergence insufficiency. Ophthalmologists, pediatricians, and general physicians  
4  
5 205 should make themselves aware of the effect of virtual learning on the pediatric population to enable  
6  
7 206 early identification and management of these conditions. In addition, countries around the world  
8  
9 207 must implement public health strategies to mitigate the impacts of a more screen-focused life,  
10  
11 208 especially with respect to conditions as common and costly as myopia. Further studies are required  
12  
13 209 to evaluate the long-term impacts of such changes associated with the COVID-19 pandemic.  
14  
15  
16  
17

## 18 210 **Contributions**

19  
20  
21 211 Conceptualization, M.C.C.-A., S.R.-G., W.A.R.-C., A.d.-l.-T and C.T.-G.; methodology, M.C.C.-  
22  
23 212 A., S.R.-G., W.A.R.-C, and C.T.-G.; investigation M.C.C.-A., S.R.-G., W.A.R.-C., A.d.-l.-T and  
24  
25 213 C.T.-G; resources, M.C.C.-A., S.R.-G., W.A.R.-C., A.d.-l.-T and C.T.-G; data curation, M.C.C.-A.,  
26  
27 214 S.R.-G., and C.T.-G.; writing—original draft preparation M.C.C.-A., S.R.-G., W.A.R.-C., A.d.-l.-T  
28  
29 215 and C.T.-G.; writing—review and editing M.C.C.-A., S.R.-G., W.A.R.-C., A.d.-l.-T and C.T.-G.;  
30  
31 216 supervision, A.d.-l.-T and C.T.-G. All authors have read and agreed to the published version of  
32  
33 217 the manuscript.  
34  
35  
36  
37

## 38 218 **Acknowledgments**

39  
40  
41 219 The review was supported by the Universidad del Rosario. The sponsors had no role in the design,  
42  
43 220 data collection, or analysis of the study. We thank Sydney Koke, MFA, from Edanz  
44  
45 221 (<https://www.edanz.com/ac>) for editing a draft of this manuscript.  
46  
47

48 222 **Competing interests:** The authors declare that they have no competing interests.

49 223 **Funding:** None.

50 224 **Patient consent for publication:** Not required.

51  
52 225 **Ethics approval:** No ethical approval was needed.  
53  
54  
55  
56  
57  
58  
59  
60

226 **Data availability statement:** Data collected from this study is available for sharing. Extraction  
 227 data are available upon request to the corresponding author.

228 **Table 2. Glossary**

229

| Term                            | Definition                                                                                                                                                                                                                 |
|---------------------------------|----------------------------------------------------------------------------------------------------------------------------------------------------------------------------------------------------------------------------|
| Accommodation                   | Contraction of the ciliary muscle resulting in a change of lens shape. (1)                                                                                                                                                 |
| Asthenopia                      | Subjective symptoms of ocular fatigue or eye strain. (1)                                                                                                                                                                   |
| Astigmatism                     | Type of refractive error due to imperfection in the curvature of the eye that causes blurred distance and near vision.(2)                                                                                                  |
| Cycloplegic refraction          | A technique used to calculate the complete refractive error by temporarily paralyzing the ciliary muscle of the eye that aid in focusing. (1)                                                                              |
| Diplopia                        | Disorder of vision in which two images of a single object are seen. (1)                                                                                                                                                    |
| Dry eye                         | Alteration of ocular surface homeostasis characterized by an alteration of the tear film.                                                                                                                                  |
| Emmetropia                      | Refractive state of an eye in which parallel rays of light entering the eye are focused on the retina, creating an image that is perceived as crisp and in focus. (3)                                                      |
| Esotropia                       | Eye misalignment in which one eye is deviated inward, or nasally. (2)                                                                                                                                                      |
| Hyperopia                       | Ocular condition in which the refracting power of the eye causes light rays entering the eye to have a focal point that is posterior to the retina while accommodation is maintained in a state of relaxation. (2)         |
| Myopia                          | Ocular condition in which the refracting power of the eye causes light rays entering the eye to have a focal point that is anterior to the retina while accommodation is maintained in a state of relaxation. (2)          |
| Orthokeratology                 | Use of specially designed and fitted contact lenses to temporarily reshape the cornea to improve vision.(4)                                                                                                                |
| Refractive errors               | Type of vision problem that makes it hard to see clearly and happens when the shape of your eye keeps light from focusing correctly on your retina.(3)                                                                     |
| Spherical equivalent refraction | Estimate of the eyes' refractive error, calculated independently for each eye. It is calculated by merging the spherical (nearsightedness or farsightedness) and cylindrical (astigmatism) refractive error components.(2) |

|          |                                                                                                   |
|----------|---------------------------------------------------------------------------------------------------|
| Vergence | The turning motion of the eyeballs toward (convergence) or away (divergence) from each other. (1) |
|----------|---------------------------------------------------------------------------------------------------|

230

231 1. Merriam-Webster.com Medical Dictionary. En 2022. Disponible en: <https://www.merriam-webster.com/>

232 2. American Academy of Ophthalmology. EyeWiki [Internet]. 2022. Disponible en:  
233 [https://eyewiki.aao.org/Main\\_Page](https://eyewiki.aao.org/Main_Page)

234 3. Palay D, Krachmer J. Primary Care Ophthalmology [Internet]. 2.<sup>a</sup> ed. Mosby; 2005. 1-23 p.  
235 Disponible en: <https://doi.org/10.1016/B978-0-323-03316-9.X5001-3>

236 4. Mukamal R. What Is Orthokeratology? [Internet]. 2018. Disponible en: <https://www.aao.org/eye-health/glasses-contacts/what-is-orthokeratology>

237  
238  
239

## 240 References:

241 1. Arora T, Grey I (2020). Health behaviour changes during COVID-19 and the potential  
242 consequences: A mini-review. *J Health Psychol* 2020;25(9):1155–1163.  
243 <https://doi.org/10.1177/1359105320937053>

244 2. Almarzooq ZI, Lopes M, Kochar A. (2020). Virtual learning during the COVID-19 pandemic. *J  
245 Am Coll Cardiol* 2020;75(20):2635–2638. <https://doi.org/10.1016/j.jacc.2020.04.015>

246 3. Enthoven CA, Tideman JW, Polling JR, et al. The impact of computer use on myopia  
247 development in childhood: the Generation R study. *Prev Med* 2020 Mar;132:105988.

248 4. Fan Q, Wang H, Kong W, et al. Online learning-related visual function impairment during and after  
249 the COVID-19 Pandemic. *Front Public Health* 2021 Nov 29;9:645971.

250 5. Holden BA, Fricke TR, Wilson DA, et al. Global prevalence of myopia and high myopia and  
251 temporal trends from 2000 through 2050. *Ophthalmology* 2016;123(5):1036–1042.  
252 <https://doi.org/10.1016/j.ophtha.2016.01.006>

253 6. Al-Mohtaseb Z, Schachter S, Shen Lee B, et al. The relationship between dry eye disease and digital  
254 screen use. *Clin Ophthalmol* 2021 Sep 10;15:3811–20.

255 7. Napoli PE, Nioi M, Fossarello M. The “quarantine dry eye”: the lockdown for coronavirus disease  
256 2019 and its implications for ocular surface health. *Risk Manag Healthc Policy* 2021 Apr  
257 19;14:1629–36.

258 8. Inomata T, Iwagami M, Nakamura M, et al. Characteristics and risk factors associated with  
259 diagnosed and undiagnosed symptomatic dry eye using a smartphone application. *JAMA  
260 Ophthalmol* 2020 Jan 1;138(1):58–68.

1  
2  
3  
4  
5  
6  
7  
8  
9  
10  
11  
12  
13  
14  
15  
16  
17  
18  
19  
20  
21  
22  
23  
24  
25  
26  
27  
28  
29  
30  
31  
32  
33  
34  
35  
36  
37  
38  
39  
40  
41  
42  
43  
44  
45  
46  
47  
48  
49  
50  
51  
52  
53  
54  
55  
56  
57  
58  
59  
60268  
269  
270  
271  
272  
273  
274  
275  
276  
277  
278  
279  
280  
281  
282  
283  
284  
285  
286  
287  
288  
289  
290  
291  
292  
293  
294  
295  
296  
297  
298  
299  
300  
301  
302  
303  
304  
305  
306  
307  
308  
309  
310  
311

9. Ma L-L, Wang Y-Y, Yang Z-H, et al. Methodological quality (risk of bias) assessment tools for primary and secondary medical studies: what are they and which is better? *Mil Med Res* 2020 Feb 29;7(1):7.
10. Hoy D, Brooks P, Woolf A, et al. Assessing risk of bias in prevalence studies: modification of an existing tool and evidence of interrater agreement. *J Clin Epidemiol* 2012 Sep;65(9):934–9.
11. Simo LP, Agbor VN, AgborNdip E, et al. Prevalence and determinants of anaemia in children aged months in Africa: a protocol for systematic review and meta-analysis. *BMJ Open* 2020 Apr 16;10(4):e032042.
12. Murad MH, Sultan S, Haffar S, et al. Methodological quality and synthesis of case series and case reports. *BMJ Evid Based Med* 2018 Apr;23(2):60–3.
13. Mohan A, Sen P, Shah C, et al. Binocular accommodation and vergence dysfunction in children attending online classes during the COVID-19 pandemic: digital eye strain in kids (DESK study-2). *J Pediatr Ophthalmol Strabismus* 2021 Jul;58(4):224–31.
14. Mohan A, Sen P, Shah C, et al. Prevalence and risk factor assessment of digital eye strain among children using online e-learning during the COVID-19 pandemic: digital eye strain among kids (DESK study-1). *Indian J Ophthalmol* 2021 Jan;69(1):140–4.
15. Chang P, Zhang B, Lin L, et al. Comparison of myopic progression before, during, and after COVID-19 lockdown. *Ophthalmology* 2021 Nov;128(11):1655–7.
16. Gupta R, Chauhan L, Varshney A. Impact of e-schooling on digital eye strain in coronavirus disease era: a survey of 654 students. *J Curr Ophthalmol* 2021 Apr;33(2):158–64.
17. Wang J, Li Y, Musch DC, et al. Progression of myopia in school-aged children after COVID-19 home confinement. *JAMA Ophthalmol* 2021 Mar 1;139(3):293–300.
18. Elhousseiny AM, Eleiwa TK, Yacoub MS, et al. Relationship between screen time and dry eye symptoms in pediatric population during the COVID-19 pandemic. *Ocul Surf* 2021 Oct;22:117–9.
19. Wang W, Zhu L, Zheng S, et al. Survey on the progression of myopia in children and adolescents in Chongqing during COVID-19 pandemic. *Front Public Health* 2021 Apr 28;9:646770.
20. Aslan F, Sahinoglu-Keskek N. The effect of home education on myopia progression in children during the COVID-19 pandemic. *Eye* 2021 Jun 30. <http://dx.doi.org/10.1038/s41433-021-01655-2>
21. Lv H, Wang Y, Sun S, et al. The impact of COVID-19 home confinement on axial length in myopic children undergoing orthokeratology. *Clin Exp Optom* 2022 Jan 4;1–5.

- 1  
2  
3 312 22. Ma D, Wei S, Li S-M, et al. The impact of study-at-home during the COVID-19 pandemic on  
4 313 myopia progression in Chinese children. *Front Public Health* 2021;9:720514.  
5 314  
6  
7 315 23. Xu L, Ma Y, Yuan J, et al. COVID-19 quarantine reveals that behavioral changes have an effect  
8 316 on myopia progression. *Ophthalmology* 2021 Nov;128(11):1652–4.  
9 317  
10 318 24. Hu Y, Zhao F, Ding X, et al. Rates of myopia development in young Chinese schoolchildren during  
11 319 the outbreak of COVID-19. *JAMA Ophthalmol* 2021 Oct 1;139(10):1115–21.  
12 320  
13 321 25. Li L, Zhang J, Chen M, et al. Contribution of total screen/online-course time to asthenopia in  
14 322 children during COVID-19 pandemic influencing psychological stress. *Front Public Health* 2021  
15 323 Dec 1;9:736617.  
16 324  
17 325 26. Li R, Ying B, Qian Y, et al. Prevalence of self-reported symptoms of computer vision syndrome  
18 326 and associated risk factors among school students in China during the COVID-19 pandemic.  
19 327 *Ophthalmic Epidemiol* 2021 Aug 25;1–11.  
20 328  
21 329 27. Mohan A, Sen P, Mujumdar D, et al. Series of cases of acute acquired comitant esotropia in children  
22 330 associated with excessive online classes on smartphone during COVID-19 pandemic; digital eye  
23 331 strain among kids (DESK study-3). *Strabismus* 2021;29(3):163–167.  
24 332 <https://doi.org/10.1080/09273972.2021.1948072>  
25 333  
26 334 28. Mohan A, Sen P, Peeush P, et al. Impact of online classes and home confinement on myopia  
27 335 progression in children during COVID-19 pandemic: digital eye strain among kids (DESK study-  
28 336 4). *Indian J Ophthalmol* 2022;70(1):241. [https://doi.org/10.4103/ijo.IJO\\_1721\\_21](https://doi.org/10.4103/ijo.IJO_1721_21)  
29 337  
30 338 29. Vagge A, Giannaccare G, Scarinci F, et al. Acute acquired concomitant esotropia from excessive  
31 339 application of near vision during the COVID-19 lockdown. *J Pediatr Ophthalmol Strabismus* 2020  
32 340 Oct 20;57:e88–91.  
33 341  
34 342 30. Alvarez-Peregrina C, Martinez-Perez C, Villa-Collar C, et al. Impact of COVID-19 home  
35 343 confinement in children's refractive errors. *Int J Environ Res Public Health* 2021 May 17;18(10).  
36 344 <http://dx.doi.org/10.3390/ijerph18105347>  
37 345  
38 346 31. Cremers SL, Khan ARG, Ahn J, et al. New indicator of children's excessive electronic screen use  
39 347 and factors in meibomian gland atrophy. *Am J Ophthalmol* 2021 Sep;229:63–70.  
40 348  
41 349 32. Mirhajianmoghadam H, Piña A, Ostrin LA. Objective and subjective behavioral measures in  
42 350 myopic and non-myopic children during the COVID-19 pandemic. *Transl Vis Sci Technol* 2021  
43 351 Sep 1;10(11):4.  
44 352  
45 353 33. Hamburger JL, Lavrich JB, Rusakevich AM, et al. The visual consequences of virtual school: acute  
46 354 eye symptoms in healthy children. *J AAPOS* 2022 Jan 12.  
47 355 <http://dx.doi.org/10.1016/j.jaapos.2021.10.003>  
48  
49  
50  
51  
52  
53  
54  
55  
56  
57  
58  
59  
60

- 1  
2  
3 356  
4 357  
5 358  
6 359  
7 360  
8 361  
9 362  
10 363  
11 364  
12 365  
13 366  
14 367  
15 368  
16 369  
17 370  
18 371  
19 372  
20 373  
21 374  
22 375  
23 376  
24 377  
25 378  
26 379  
27 380  
28 381  
29 382  
30 383  
31 384  
32 385  
33 386  
34 387  
35 388  
36 389  
37 390  
38 391  
39 392  
40 393  
41 394  
42 395  
43 396  
44 397  
45 398  
46 399
34. Wong CW, Tsai A, Jonas JB, et al. Digital screen time during the COVID-19 pandemic: risk for a further myopia boom? *Am J Ophthalmol* 2021 Mar;223:333–7.
35. Jones-Jordan LA, Mitchell GL, Cotter SA, et al. Visual activity before and after the onset of juvenile myopia. *Invest Ophthalmol Vis Sci* 2011 Mar;52(3):1841–50.
36. Mccrann S, Loughman J, Butler JS, et al. Smartphone use as a possible risk factor for myopia. *Clin Exp Optom* 2021 Jan;104(1):35–41.
37. Lanca C, Saw S-M. The association between digital screen time and myopia: a systematic review. *Ophthalmic Physiol Opt* 2020 Mar;40(2):216–29.
38. He M, Xiang F, Zeng Y, et al. Effect of time spent outdoors at school on the development of myopia among children in China: a randomized clinical trial. *JAMA* 2015 Sep 15;314(11):1142–8.
39. McCarthy CS, Megaw P, Devadas M, et al. Dopaminergic agents affect the ability of brief periods of normal vision to prevent form-deprivation myopia. *Exp Eye Res* 2007 Jan;84(1):100–7.
40. Feldkaemper M, Schaeffel F. An updated view on the role of dopamine in myopia. *Exp Eye Res* 2013 Sep;114:106–19.
41. Wu P-C, Chen C-T, Lin K-K, et al. Myopia prevention and outdoor light intensity in a school-based cluster randomized trial. *Ophthalmology* 2018 Aug;125(8):1239–50.
42. Ip JM, Saw S-M, Rose KA, et al. Role of near work in myopia: findings in a sample of Australian school children. *Invest Ophthalmol Vis Sci* 2008 Jul;49(7):2903–10
43. Si J-K, Tang K, Bi H-S, et al. Orthokeratology for myopia control: a meta-analysis. *Optom Vis Sci* 2015 Mar;92(3):252–7.
44. Wong YL, Yuan Y, Su B, et al. Prediction of myopia onset with refractive error measured using non-cycloplegic subjective refraction: the WEPrOM Study. *BMJ Open Ophthalmol* 2021 Jun 9;6(1):e000628.
45. Lee HS, Park SW, Heo H. Acute acquired comitant esotropia related to excessive smartphone use. *BMC Ophthalmol* 2016 Apr 9;16:37.
46. Motlagh M, Geetha R. Physiology, Accommodation. 2022 May 10. In: StatPearls [Internet]. Treasure Island (FL): StatPearls Publishing; 2022.
47. Uchino M, Yokoi N, Uchino Y, et al. Prevalence of dry eye disease and its risk factors in visual display terminal users: the Osaka study. *Am J Ophthalmol* 2013 Oct;156(4):759–66.

- 1  
2  
3 400 48. Hanyuda A, Sawada N, Uchino M, et al. Physical inactivity, prolonged sedentary behaviors, and  
4 401 use of visual display terminals as potential risk factors for dry eye disease: JPHC-NEXT study.  
5 402 *Ocul Surf* 2020 Jan;18(1):56–63.  
6 403  
7  
8 404 49. Bhattacharya S, Saleem SM, Singh A. Digital eye strain in the era of COVID-19 pandemic: an  
9 405 emerging public health threat. *Indian J Ophthalmol* 2020 Aug;68(8):1709–10.  
10 406  
11 407 50. Rojas-Carabali W, Uribe-Reina P, Muñoz-Ortiz J, et al. High prevalence of abnormal ocular surface  
12 408 tests in a healthy pediatric population. *Clin Ophthalmol* 2020 Oct 22;14:3427–38.  
13 409  
14 410 51. Rossi GCM, Scudeller L, Bettio F, et al. Prevalence of dry eye in video display terminal users: a  
15 411 cross-sectional Caucasian study in Italy. *Int Ophthalmol* 2019 Jun;39(6):1315–22.  
16 412  
17 413  
18 414  
19 415  
20 416  
21 417  
22 418  
23 419

**Figure Legend:**

Figure 1- PRISMA Flow Diagram

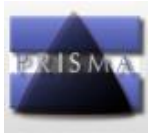

## PRISMA 2009 Flow Diagram

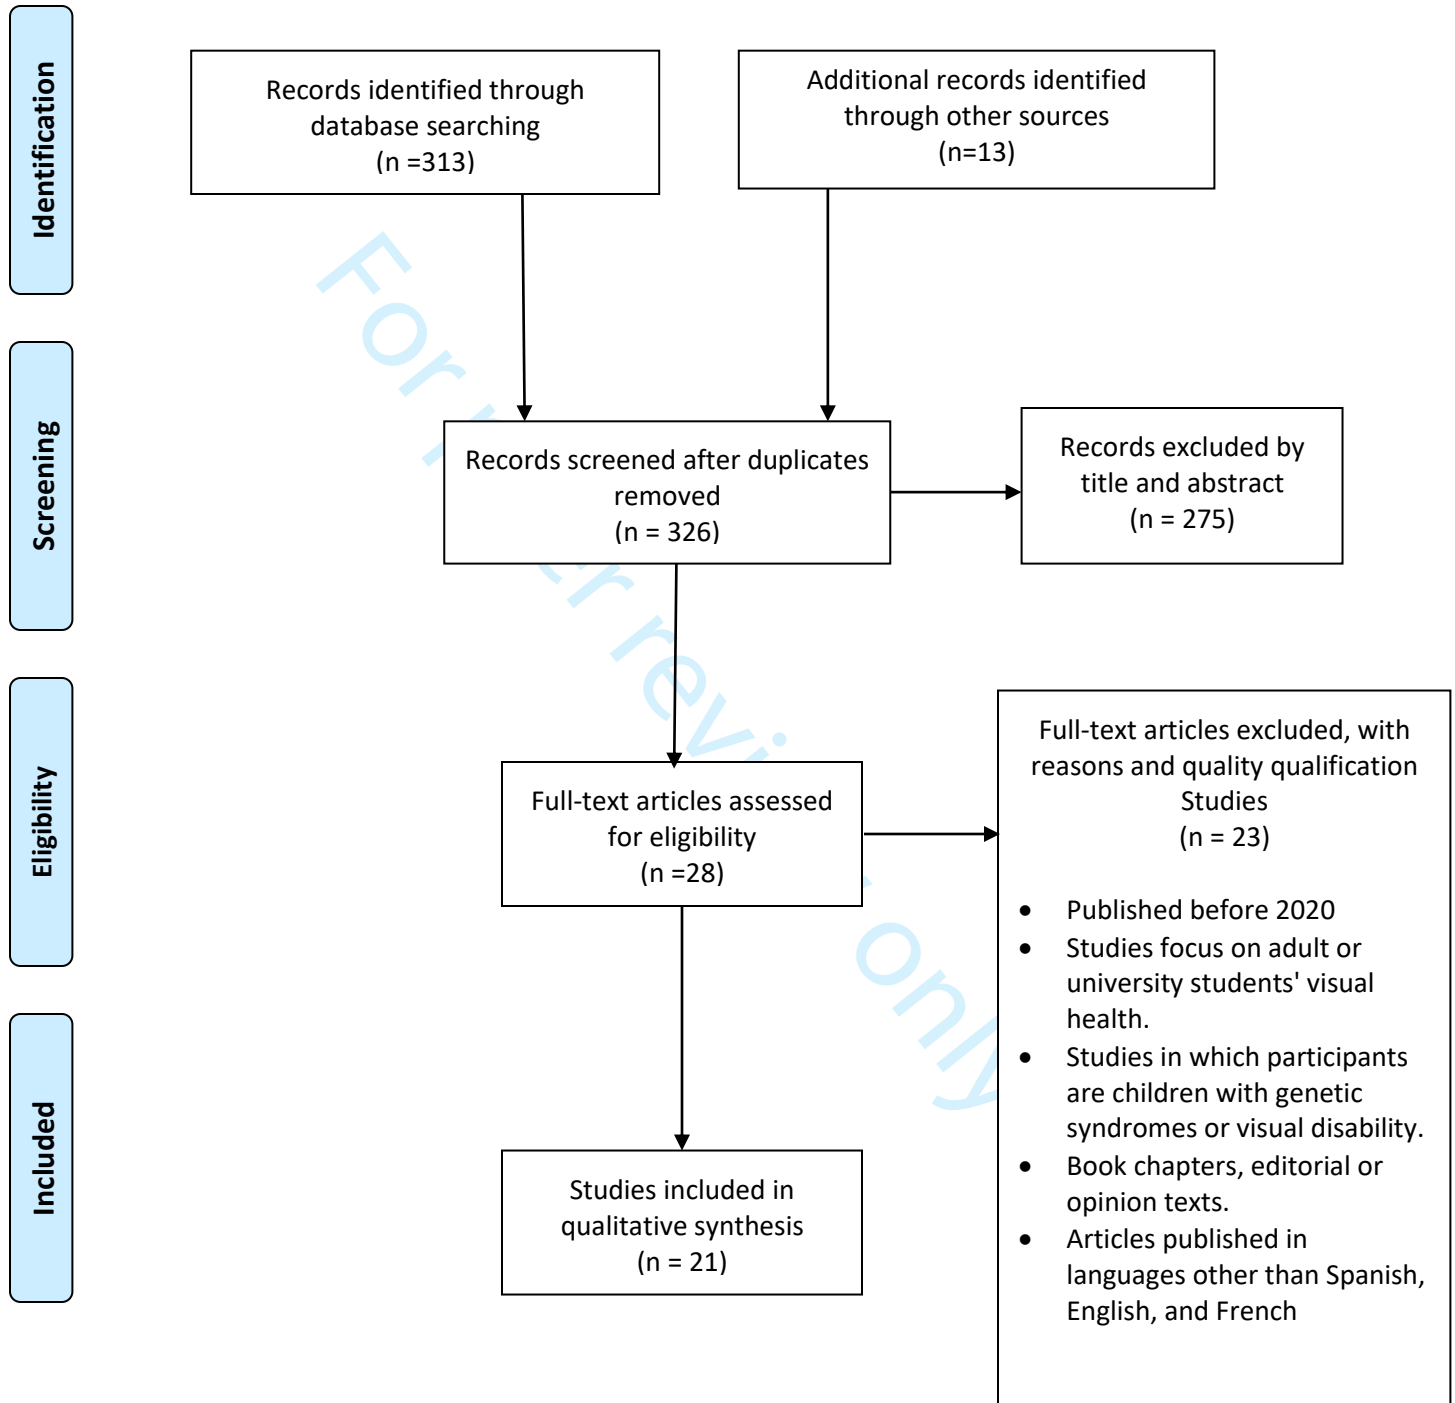

From: Moher D, Liberati A, Tetzlaff J, Altman DG, The PRISMA Group (2009). Preferred Reporting Items for Systematic Reviews and Meta-Analyses: The PRISMA Statement. PLoS Med 6(6): e1000097. doi:10.1371/journal.pmed1000097

For more information, visit [www.prisma-statement.org](http://www.prisma-statement.org).

For peer review only - <http://bmjopen.bmj.com/site/about/guidelines.xhtml>



Supplementary table 1: PRISMA 2020 Checklist

| Section and Topic             | Item # | Checklist item                                                                                                                                                                                                                                                                                       | Location where item is reported |
|-------------------------------|--------|------------------------------------------------------------------------------------------------------------------------------------------------------------------------------------------------------------------------------------------------------------------------------------------------------|---------------------------------|
| <b>TITLE</b>                  |        |                                                                                                                                                                                                                                                                                                      |                                 |
| Title                         | 1      | Identify the report as a systematic review.                                                                                                                                                                                                                                                          | 1                               |
| <b>ABSTRACT</b>               |        |                                                                                                                                                                                                                                                                                                      |                                 |
| Abstract                      | 2      | See the PRISMA 2020 for Abstracts checklist.                                                                                                                                                                                                                                                         | 2                               |
| <b>INTRODUCTION</b>           |        |                                                                                                                                                                                                                                                                                                      |                                 |
| Rationale                     | 3      | Describe the rationale for the review in the context of existing knowledge.                                                                                                                                                                                                                          | 3, 4                            |
| Objectives                    | 4      | Provide an explicit statement of the objective(s) or question(s) the review addresses.                                                                                                                                                                                                               | 4                               |
| <b>METHODS</b>                |        |                                                                                                                                                                                                                                                                                                      |                                 |
| Eligibility criteria          | 5      | Specify the inclusion and exclusion criteria for the review and how studies were grouped for the syntheses.                                                                                                                                                                                          | 5                               |
| Information sources           | 6      | Specify all databases, registers, websites, organisations, reference lists and other sources searched or consulted to identify studies. Specify the date when each source was last searched or consulted.                                                                                            | 5                               |
| Search strategy               | 7      | Present the full search strategies for all databases, registers and websites, including any filters and limits used.                                                                                                                                                                                 | 5                               |
| Selection process             | 8      | Specify the methods used to decide whether a study met the inclusion criteria of the review, including how many reviewers screened each record and each report retrieved, whether they worked independently, and if applicable, details of automation tools used in the process.                     | 5,6                             |
| Data collection process       | 9      | Specify the methods used to collect data from reports, including how many reviewers collected data from each report, whether they worked independently, any processes for obtaining or confirming data from study investigators, and if applicable, details of automation tools used in the process. | 5,6                             |
| Data items                    | 10a    | List and define all outcomes for which data were sought. Specify whether all results that were compatible with each outcome domain in each study were sought (e.g. for all measures, time points, analyses), and if not, the methods used to decide which results to collect.                        | 5,6                             |
|                               | 10b    | List and define all other variables for which data were sought (e.g. participant and intervention characteristics, funding sources). Describe any assumptions made about any missing or unclear information.                                                                                         | N.A                             |
| Study risk of bias assessment | 11     | Specify the methods used to assess risk of bias in the included studies, including details of the tool(s) used, how many reviewers assessed each study and whether they worked independently, and if applicable, details of automation tools used in the process.                                    | 6, Supplemental table 1         |
| Effect measures               | 12     | Specify for each outcome the effect measure(s) (e.g. risk ratio, mean difference) used in the synthesis or presentation of results.                                                                                                                                                                  | 8: Table 1                      |
| Synthesis methods             | 13a    | Describe the processes used to decide which studies were eligible for each synthesis (e.g. tabulating the study intervention characteristics and comparing against the planned groups for each synthesis (item #5)).                                                                                 | 5,6                             |
|                               | 13b    | Describe any methods required to prepare the data for presentation or synthesis, such as handling of missing summary statistics, or data conversions.                                                                                                                                                | 5                               |

|                           |     |                                                                                                                                                                                                                                                             |                      |
|---------------------------|-----|-------------------------------------------------------------------------------------------------------------------------------------------------------------------------------------------------------------------------------------------------------------|----------------------|
|                           | 13c | Describe any methods used to tabulate or visually display results of individual studies and syntheses.                                                                                                                                                      | 6                    |
|                           | 13d | Describe any methods used to synthesize results and provide a rationale for the choice(s). If meta-analysis was performed, describe the model(s), method(s) to identify the presence and extent of statistical heterogeneity, and software package(s) used. | 6                    |
|                           | 13e | Describe any methods used to explore possible causes of heterogeneity among study results (e.g. subgroup analysis, meta-regression).                                                                                                                        | 6                    |
|                           | 13f | Describe any sensitivity analyses conducted to assess robustness of the synthesized results.                                                                                                                                                                | N.A                  |
| Reporting bias assessment | 14  | Describe any methods used to assess risk of bias due to missing results in a synthesis (arising from reporting biases).                                                                                                                                     | Supplemental table 1 |
| Certainty assessment      | 15  | Describe any methods used to assess certainty (or confidence) in the body of evidence for an outcome.                                                                                                                                                       | N.A                  |

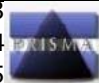

### PRISMA 2020 Checklist

| Section and Topic             | Item # | Checklist item                                                                                                                                                                                                                                                                       | Location where item is reported |
|-------------------------------|--------|--------------------------------------------------------------------------------------------------------------------------------------------------------------------------------------------------------------------------------------------------------------------------------------|---------------------------------|
| <b>RESULTS</b>                |        |                                                                                                                                                                                                                                                                                      |                                 |
| Study selection               | 16a    | Describe the results of the search and selection process, from the number of records identified in the search to the number of studies included in the review, ideally using a flow diagram.                                                                                         | 8-10                            |
|                               | 16b    | Cite studies that might appear to meet the inclusion criteria, but which were excluded, and explain why they were excluded.                                                                                                                                                          | 7                               |
| Study characteristics         | 17     | Cite each included study and present its characteristics.                                                                                                                                                                                                                            | 8-10                            |
| Risk of bias in studies       | 18     | Present assessments of risk of bias for each included study.                                                                                                                                                                                                                         | 6, Supplementary table 1        |
| Results of individual studies | 19     | For all outcomes, present, for each study: (a) summary statistics for each group (where appropriate) and (b) an effect estimate and its precision (e.g. confidence/credible interval), ideally using structured tables or plots.                                                     | N.A                             |
| Results of syntheses          | 20a    | For each synthesis, briefly summarise the characteristics and risk of bias among contributing studies.                                                                                                                                                                               | 6, Supplementary table 1        |
|                               | 20b    | Present results of all statistical syntheses conducted. If meta-analysis was done, present for each the summary estimate and its precision (e.g. confidence/credible interval) and measures of statistical heterogeneity. If comparing groups, describe the direction of the effect. | N.A                             |
|                               | 20c    | Present results of all investigations of possible causes of heterogeneity among study results.                                                                                                                                                                                       | N.A                             |

|                                                   |     |                                                                                                                                                                                                                                            |                       |
|---------------------------------------------------|-----|--------------------------------------------------------------------------------------------------------------------------------------------------------------------------------------------------------------------------------------------|-----------------------|
|                                                   | 20d | Present results of all sensitivity analyses conducted to assess the robustness of the synthesized results.                                                                                                                                 | 8: Table 1            |
| 1 Reporting biases                                | 21  | Present assessments of risk of bias due to missing results (arising from reporting biases) for each synthesis assessed.                                                                                                                    | N.A                   |
| 2                                                 |     |                                                                                                                                                                                                                                            |                       |
| 3                                                 |     |                                                                                                                                                                                                                                            |                       |
| 4 Certainty of evidence                           | 22  | Present assessments of certainty (or confidence) in the body of evidence for each outcome assessed.                                                                                                                                        | Supplementary table 1 |
| 5                                                 |     |                                                                                                                                                                                                                                            |                       |
| <b>DISCUSSION</b>                                 |     |                                                                                                                                                                                                                                            |                       |
| 6                                                 |     |                                                                                                                                                                                                                                            |                       |
| 7 Discussion                                      | 23a | Provide a general interpretation of the results in the context of other evidence.                                                                                                                                                          | 10-17                 |
| 8                                                 | 23b | Discuss any limitations of the evidence included in the review.                                                                                                                                                                            | 17                    |
| 9                                                 | 23c | Discuss any limitations of the review processes used.                                                                                                                                                                                      | 17                    |
| 10                                                | 23d | Discuss implications of the results for practice, policy, and future research.                                                                                                                                                             | 17                    |
| 11                                                |     |                                                                                                                                                                                                                                            |                       |
| <b>OTHER INFORMATION</b>                          |     |                                                                                                                                                                                                                                            |                       |
| 12                                                |     |                                                                                                                                                                                                                                            |                       |
| 13                                                |     |                                                                                                                                                                                                                                            |                       |
| 14                                                |     |                                                                                                                                                                                                                                            |                       |
| 15                                                |     |                                                                                                                                                                                                                                            |                       |
| 16 Registration and protocol                      | 24a | Provide registration information for the review, including register name and registration number, or state that the review was not registered.                                                                                             | 5                     |
| 17                                                | 24b | Indicate where the review protocol can be accessed, or state that a protocol was not prepared.                                                                                                                                             | 5                     |
| 18                                                | 24c | Describe and explain any amendments to information provided at registration or in the protocol.                                                                                                                                            | N.A                   |
| 19                                                |     |                                                                                                                                                                                                                                            |                       |
| 20                                                |     |                                                                                                                                                                                                                                            |                       |
| 21 Support                                        | 25  | Describe sources of financial or non-financial support for the review, and the role of the funders or sponsors in the review.                                                                                                              | 18                    |
| 22                                                |     |                                                                                                                                                                                                                                            |                       |
| 23 Competing interests                            | 26  | Declare any competing interests of review authors.                                                                                                                                                                                         | 18                    |
| 24                                                |     |                                                                                                                                                                                                                                            |                       |
| 25                                                |     |                                                                                                                                                                                                                                            |                       |
| 26 Availability of data, code and other materials | 27  | Report which of the following are publicly available and where they can be found: template data collection forms; data extracted from included studies; data used for all analyses; analytic code; any other materials used in the review. | 18                    |
| 27                                                |     |                                                                                                                                                                                                                                            |                       |
| 28                                                |     |                                                                                                                                                                                                                                            |                       |
| 29                                                |     |                                                                                                                                                                                                                                            |                       |
| 30                                                |     |                                                                                                                                                                                                                                            |                       |
| 31                                                |     |                                                                                                                                                                                                                                            |                       |

32  
33 *From:* Page MJ, McKenzie JE, Bossuyt PM, Boutron I, Hoffmann TC, Mulrow CD, et al. The PRISMA 2020 statement: an updated guideline for reporting  
34 systematic reviews. *BMJ* 2021;372:n71. doi:  
35 10.1136/bmj.n71

36  
37 For more information, visit: <http://www.prisma-statement.org/>

Supplementary Table 2: Risk of bias assessment

Risk of bias assessment of cross-sectional studies using the Hoy et al. proposed tool.

| Article                                                                                                                                                       | Question 1     | Question 2     | Question 3     | Question 4     | Question 5     | Question 6     | Question 7     | Question 8     | Question 9     | Question 10    | Summary on the overall risk of study bias |
|---------------------------------------------------------------------------------------------------------------------------------------------------------------|----------------|----------------|----------------|----------------|----------------|----------------|----------------|----------------|----------------|----------------|-------------------------------------------|
| Relationship between screen time and dry eye symptoms in pediatric population during the COVID-19 pandemic.                                                   | YES (LOW RISK) | NO (HIGH RISK) | YES (LOW RISK) | YES (LOW RISK) | Low risk                                  |
|                                                                                                                                                               |                |                |                |                |                |                |                |                |                |                | Moderate risk                             |
|                                                                                                                                                               |                |                |                |                |                |                |                |                |                |                | High risk                                 |
| Impact of COVID-19 Home Confinement in Children’s Refractive Errors                                                                                           | YES (LOW RISK) | Low risk                                  |
|                                                                                                                                                               |                |                |                |                |                |                |                |                |                |                | Moderate risk                             |
|                                                                                                                                                               |                |                |                |                |                |                |                |                |                |                | High risk                                 |
| Binocular accommodation and vergence dysfunction in children attending online classes during the COVID-19 pandemic: digital eye strain in kids (DESK) study-2 | NO (HIGH RISK) | YES (LOW RISK) | NO (HIGH RISK) | NO (HIGH RISK) | YES (LOW RISK) | Low risk                                  |
|                                                                                                                                                               |                |                |                |                |                |                |                |                |                |                | Moderate risk                             |
|                                                                                                                                                               |                |                |                |                |                |                |                |                |                |                | High risk                                 |
| Objective and subjective behavioral measures in myopic and non-myopic children during the covid-19 pandemic                                                   | NO (HIGH RISK) | YES (LOW RISK) | NO (HIGH RISK) | NO (HIGH RISK) | YES (LOW RISK) | NO (HIGH RISK) | YES (LOW RISK) | YES (LOW RISK) | YES (LOW RISK) | YES (LOW RISK) | Low risk                                  |
|                                                                                                                                                               |                |                |                |                |                |                |                |                |                |                | Moderate risk                             |
|                                                                                                                                                               |                |                |                |                |                |                |                |                |                |                | High risk                                 |
| The visual consequences of virtual school: acute eye symptoms in healthy children                                                                             | NO (HIGH RISK) | YES (LOW RISK) | NO (HIGH RISK) | NO (HIGH RISK) | YES (LOW RISK) | NO (HIGH RISK) | YES (LOW RISK) | YES (LOW RISK) | YES (LOW RISK) | YES (LOW RISK) | Low risk                                  |
|                                                                                                                                                               |                |                |                |                |                |                |                |                |                |                | Moderate risk                             |
|                                                                                                                                                               |                |                |                |                |                |                |                |                |                |                | High risk                                 |
| Impact of E-schooling on digital eye strain in Coronavirus Disease Era: A survey of 654 students                                                              | YES (LOW RISK) | NO (HIGH RISK) | YES (LOW RISK) | YES (LOW RISK) | YES (LOW RISK) | YES (LOW RISK) | Low risk                                  |
|                                                                                                                                                               |                |                |                |                |                |                |                |                |                |                | Moderate risk                             |
|                                                                                                                                                               |                |                |                |                |                |                |                |                |                |                | High risk                                 |
|                                                                                                                                                               | YES            | NO             | YES            | NO             | YES            | YES            | YES            | YES            | YES            | YES            | Low risk                                  |

|                                                                                                                                                                              |                |                |                |                |                |                |                |                |                |                |                |               |
|------------------------------------------------------------------------------------------------------------------------------------------------------------------------------|----------------|----------------|----------------|----------------|----------------|----------------|----------------|----------------|----------------|----------------|----------------|---------------|
| Prevalence and risk factor assessment of digital eye strain among children using online elearning during the COVID-19 pandemic: Digital eye strain among kids (DESK study-1) | (LOW RISK)     | (HIGH RISK)    | (LOW RISK)     | (HIGH RISK)    | (LOW RISK)     | (LOW RISK)     | (LOW RISK)     | (LOW RISK)     | (LOW RISK)     | (LOW RISK)     | (LOW RISK)     | Moderate risk |
|                                                                                                                                                                              |                |                |                |                |                |                |                |                |                |                |                | High risk     |
| Progression of Myopia in School-Aged Children after COVID-19 Home Confinement                                                                                                | NO (HIGH RISK) | NO (HIGH RISK) | NO (HIGH RISK) | YES (LOW RISK) | Low risk      |
|                                                                                                                                                                              |                |                |                |                |                |                |                |                |                |                |                | Moderate risk |
|                                                                                                                                                                              |                |                |                |                |                |                |                |                |                |                |                | High risk     |

Interpretation: Low risk: 0-4 (No:High risk), Moderate risk: 5-7 (No:High risk), High risk 8-10 (No:High risk)

**Risk of bias assessment for before-and-after studies using NIH tool.**

| Article                                                                                                      | Question 1 | Question 2 | Question 3 | Question 4 | Question 5 | Question 6 | Question 7 | Question 8 | Question 9 | Question 10 | Question 11 | Question 12 | Quality Rating |
|--------------------------------------------------------------------------------------------------------------|------------|------------|------------|------------|------------|------------|------------|------------|------------|-------------|-------------|-------------|----------------|
| Comparison of Myopic Progression before, during, and after COVID-19 Lockdown<br>10.1016/j.ophtha.2021.03.029 | YES        | NO         | YES        | CD         | NR         | YES        | YES        | NR         | NO         | YES         | YES         | YES         | Good           |
|                                                                                                              |            |            |            |            |            |            |            |            |            |             |             |             | Fair           |
|                                                                                                              |            |            |            |            |            |            |            |            |            |             |             |             | Poor           |
| Survey on the Progression of Myopia in Children and Adolescents in Chongqing During COVID-19 Pandemic        | YES        | NR         | YES        | YES         | NO          | YES         | Good           |
|                                                                                                              |            |            |            |            |            |            |            |            |            |             |             |             | Fair           |
|                                                                                                              |            |            |            |            |            |            |            |            |            |             |             |             | Poor           |
| The effect of home education on myopia progression in children during the COVID-19 pandemic                  | YES        | YES        | NR         | YES        | CD         | YES        | YES        | NR         | YES        | YES         | NO          | YES         | Good           |
|                                                                                                              |            |            |            |            |            |            |            |            |            |             |             |             | Fair           |
|                                                                                                              |            |            |            |            |            |            |            |            |            |             |             |             | Poor           |
|                                                                                                              | YES        | YES        | NR         | NR         | CD         | YES        | YES        | NR         | CD         | YES         | NO          | YES         | Good           |

|                                                                                                                                                          |     |     |     |     |     |     |     |     |     |     |     |     |     |      |
|----------------------------------------------------------------------------------------------------------------------------------------------------------|-----|-----|-----|-----|-----|-----|-----|-----|-----|-----|-----|-----|-----|------|
| The impact of COVID-19 home confinement on axial length in myopic children undergoing orthokeratology                                                    |     |     |     |     |     |     |     |     |     |     |     |     |     | Fair |
|                                                                                                                                                          |     |     |     |     |     |     |     |     |     |     |     |     |     | Poor |
| COVID-19 Quarantine Reveals That Behavioral Changes Have an Effect on Myopia Progression.<br>10.1016/j.ophtha.2021.04.001                                | YES | NR  | YES | YES | CD  | YES | YES | Good |
|                                                                                                                                                          |     |     |     |     |     |     |     |     |     |     |     |     |     | Fair |
|                                                                                                                                                          |     |     |     |     |     |     |     |     |     |     |     |     |     | Poor |
| Contribution of Total Screen/Online-Course Time to Asthenopia in Children During COVID-19 Pandemic via Influencing Psychological Stress                  | YES | Good |
|                                                                                                                                                          |     |     |     |     |     |     |     |     |     |     |     |     |     | Fair |
|                                                                                                                                                          |     |     |     |     |     |     |     |     |     |     |     |     |     | Poor |
| Prevalence of Self-Reported Symptoms of Computer Vision Syndrome and Associated Risk Factors among School Students in China during the COVID 19 Pandemic | YES | Good |
|                                                                                                                                                          |     |     |     |     |     |     |     |     |     |     |     |     |     | Fair |
|                                                                                                                                                          |     |     |     |     |     |     |     |     |     |     |     |     |     | Poor |

Interpretation: Good: 10 or more YES; Fair: 6 or more YES; Poor: 5 or less YES Abbreviations:

CD: Cannot Determine; NR: Not reported.

#### Risk of bias assessment of case series using the Murad MH et al. proposed tool.

| Article                                                                                                     | Selection  | Ascertainment |            | Causality  |            |            |            | Reporting  |
|-------------------------------------------------------------------------------------------------------------|------------|---------------|------------|------------|------------|------------|------------|------------|
|                                                                                                             | Question 1 | Question 2    | Question 3 | Question 4 | Question 5 | Question 6 | Question 7 | Question 8 |
| Acute Acquired Concomitant Esotropia From Excessive Application of Near Vision During the COVID-19 Lockdown | YES        | YES           | YES        | YES        | NA         | NA         | NO         | YES        |

#### Risk of bias assessment of cohort studies using the NEWCASTLE - OTTAWA QUALITY ASSESSMENT SCALE

3

| Article                                                                                          | Selection                                                                                                     |                                                             |                                                                     |                                                                                     | Comparability                                                              | Outcome                                                                            |                                                                                                                                           |                                                                                                       | Overall  |
|--------------------------------------------------------------------------------------------------|---------------------------------------------------------------------------------------------------------------|-------------------------------------------------------------|---------------------------------------------------------------------|-------------------------------------------------------------------------------------|----------------------------------------------------------------------------|------------------------------------------------------------------------------------|-------------------------------------------------------------------------------------------------------------------------------------------|-------------------------------------------------------------------------------------------------------|----------|
|                                                                                                  | Question 1                                                                                                    | Question 2                                                  | Question 3                                                          | Question 4                                                                          | Question 1                                                                 | Question 1                                                                         | Question 2                                                                                                                                | Question 3                                                                                            |          |
| The Impact of Study-atHome During the COVID19 Pandemic on Myopia Progression in Chinese Children | 1 Star. Truly representative of the average primary schools in Fuxing District, Handan, Hebei, China children | 1 Star. Drawn from the same community as the exposed cohort | 1 Star. Secure record (eg medical records and clinical evaluations) | 0 Star.                                                                             | 1 Star. Study controls for not exposed to exposure factors (study at home) | 1 Star. Confirmation of the outcome by reference to secure records and self report | 1 Star. Yes: 6 months Assessment at baseline (July 2019), at the first follow-up (January 2020) and at the second follow-up (August 2020) | 0 Star. No statement                                                                                  | 6 Stars. |
| Rates of Myopia Development in Young Chinese Schoolchildren During the Outbreak of COVID-19      | 1 Star. somewhat representative of the average children in the community. (Especially, young school children) | 1 Star. Drawn from the same community as the exposed cohort | 1 Star. Secure record (eg medical records and clinical evaluations) | 1 Star. They described the percentages of patients without the outcome at baseline. | 1 Star. Study controls for grade.                                          | 1 Star. Confirmation of the outcome by reference to secure records.                | 1 Star. 3 measurements in 3 years.                                                                                                        | 1 Star. Subjects lost to follow up unlikely to introduce bias - small number lost - < 20 % follow up. | 7 Stars. |
