# Supplementary material for: Effects of remote learning during the COVID-19 lockdown on children’s visual health: a systematic review
Source: PubMed Central journal article supplement — BMJ Open. 2022 Aug 2;12(8):e062388. doi: 10.1136/bmjopen-2022-062388 (PMC9352565; doi:10.1136/bmjopen-2022-062388), 2022-08-02
Supplement: bmjopen-2022-062388supp002.pdf [file bmjopen-2022-062388supp002.pdf]

**Supplementary Table 2: Risk of bias assessment****Risk of bias assessment of cross-sectional studies using the Hoy et al. proposed tool.**

| Article                                                                                                                                                       | Question 1        | Question 2        | Question 3        | Question 4        | Question 5        | Question 6        | Question 7        | Question 8        | Question 9        | Question 10       | Summary on the overall risk of study bias |
|---------------------------------------------------------------------------------------------------------------------------------------------------------------|-------------------|-------------------|-------------------|-------------------|-------------------|-------------------|-------------------|-------------------|-------------------|-------------------|-------------------------------------------|
| Relationship between screen time and dry eye symptoms in pediatric population during the COVID-19 pandemic.                                                   | YES<br>(LOW RISK) | NO<br>(HIGH RISK) | YES<br>(LOW RISK) | YES<br>(LOW RISK) | Low risk                                  |
|                                                                                                                                                               |                   |                   |                   |                   |                   |                   |                   |                   |                   |                   | Moderate risk                             |
|                                                                                                                                                               |                   |                   |                   |                   |                   |                   |                   |                   |                   |                   | High risk                                 |
| Impact of COVID-19 Home Confinement in Children's Refractive Errors                                                                                           | YES<br>(LOW RISK) | Low risk                                  |
|                                                                                                                                                               |                   |                   |                   |                   |                   |                   |                   |                   |                   |                   | Moderate risk                             |
|                                                                                                                                                               |                   |                   |                   |                   |                   |                   |                   |                   |                   |                   | High risk                                 |
| Binocular accommodation and vergence dysfunction in children attending online classes during the COVID-19 pandemic: digital eye strain in kids (DESK) study-2 | NO<br>(HIGH RISK) | YES<br>(LOW RISK) | NO<br>(HIGH RISK) | NO<br>(HIGH RISK) | YES<br>(LOW RISK) | Low risk                                  |
|                                                                                                                                                               |                   |                   |                   |                   |                   |                   |                   |                   |                   |                   | Moderate risk                             |
|                                                                                                                                                               |                   |                   |                   |                   |                   |                   |                   |                   |                   |                   | High risk                                 |
| Objective and subjective behavioral measures in myopic and non-myopic children during the covid-19 pandemic                                                   | NO<br>(HIGH RISK) | YES<br>(LOW RISK) | NO<br>(HIGH RISK) | NO<br>(HIGH RISK) | YES<br>(LOW RISK) | NO<br>(HIGH RISK) | YES<br>(LOW RISK) | YES<br>(LOW RISK) | YES<br>(LOW RISK) | YES<br>(LOW RISK) | Low risk                                  |
|                                                                                                                                                               |                   |                   |                   |                   |                   |                   |                   |                   |                   |                   | Moderate risk                             |
|                                                                                                                                                               |                   |                   |                   |                   |                   |                   |                   |                   |                   |                   | High risk                                 |
| The visual consequences of virtual school: acute eye symptoms in healthy children                                                                             | NO<br>(HIGH RISK) | YES<br>(LOW RISK) | NO<br>(HIGH RISK) | NO<br>(HIGH RISK) | YES<br>(LOW RISK) | NO<br>(HIGH RISK) | YES<br>(LOW RISK) | YES<br>(LOW RISK) | YES<br>(LOW RISK) | YES<br>(LOW RISK) | Low risk                                  |
|                                                                                                                                                               |                   |                   |                   |                   |                   |                   |                   |                   |                   |                   | Moderate risk                             |
|                                                                                                                                                               |                   |                   |                   |                   |                   |                   |                   |                   |                   |                   | High risk                                 |
| Impact of E-schooling on digital eye strain in Coronavirus Disease Era: A survey of 654 students                                                              | YES<br>(LOW RISK) | NO<br>(HIGH RISK) | YES<br>(LOW RISK) | YES<br>(LOW RISK) | YES<br>(LOW RISK) | YES<br>(LOW RISK) | Low risk                                  |
|                                                                                                                                                               |                   |                   |                   |                   |                   |                   |                   |                   |                   |                   | Moderate risk                             |
|                                                                                                                                                               |                   |                   |                   |                   |                   |                   |                   |                   |                   |                   | High risk                                 |
|                                                                                                                                                               | YES               | NO                | YES               | NO                | YES               | YES               | YES               | YES               | YES               | YES               | Low risk                                  |

|                                                                                                                                                                              |                |                |                |                |                |                |                |                |                |                |                |               |
|------------------------------------------------------------------------------------------------------------------------------------------------------------------------------|----------------|----------------|----------------|----------------|----------------|----------------|----------------|----------------|----------------|----------------|----------------|---------------|
| Prevalence and risk factor assessment of digital eye strain among children using online elearning during the COVID-19 pandemic: Digital eye strain among kids (DESK study-1) | (LOW RISK)     | (HIGH RISK)    | (LOW RISK)     | (HIGH RISK)    | (LOW RISK)     | (LOW RISK)     | (LOW RISK)     | (LOW RISK)     | (LOW RISK)     | (LOW RISK)     | (LOW RISK)     | Moderate risk |
|                                                                                                                                                                              |                |                |                |                |                |                |                |                |                |                |                | High risk     |
| Progression of Myopia in School-Aged Children after COVID-19 Home Confinement                                                                                                | NO (HIGH RISK) | NO (HIGH RISK) | NO (HIGH RISK) | YES (LOW RISK) | Low risk      |
|                                                                                                                                                                              |                |                |                |                |                |                |                |                |                |                |                | Moderate risk |
|                                                                                                                                                                              |                |                |                |                |                |                |                |                |                |                |                | High risk     |

Interpretation: Low risk: 0-4 (No:High risk), Moderate risk: 5-7 (No:High risk), High risk 8-10 (No:High risk)

#### Risk of bias assessment for before-and-after studies using NIH tool.

| Article                                                                                                      | Question 1 | Question 2 | Question 3 | Question 4 | Question 5 | Question 6 | Question 7 | Question 8 | Question 9 | Question 10 | Question 11 | Question 12 | Quality Rating |
|--------------------------------------------------------------------------------------------------------------|------------|------------|------------|------------|------------|------------|------------|------------|------------|-------------|-------------|-------------|----------------|
| Comparison of Myopic Progression before, during, and after COVID-19 Lockdown<br>10.1016/j.ophtha.2021.03.029 | YES        | NO         | YES        | CD         | NR         | YES        | YES        | NR         | NO         | YES         | YES         | YES         | Good           |
|                                                                                                              |            |            |            |            |            |            |            |            |            |             |             |             | Fair           |
|                                                                                                              |            |            |            |            |            |            |            |            |            |             |             |             | Poor           |
| Survey on the Progression of Myopia in Children and Adolescents in Chongqing During COVID-19 Pandemic        | YES        | NR         | YES        | YES         | NO          | YES         | Good           |
|                                                                                                              |            |            |            |            |            |            |            |            |            |             |             |             | Fair           |
|                                                                                                              |            |            |            |            |            |            |            |            |            |             |             |             | Poor           |
| The effect of home education on myopia progression in children during the COVID-19 pandemic                  | YES        | YES        | NR         | YES        | CD         | YES        | YES        | NR         | YES        | YES         | NO          | YES         | Good           |
|                                                                                                              |            |            |            |            |            |            |            |            |            |             |             |             | Fair           |
|                                                                                                              |            |            |            |            |            |            |            |            |            |             |             |             | Poor           |
|                                                                                                              | YES        | YES        | NR         | NR         | CD         | YES        | YES        | NR         | CD         | YES         | NO          | YES         | Good           |

|                                                                                                                                                          |     |     |     |     |     |     |     |     |     |     |     |     |      |      |
|----------------------------------------------------------------------------------------------------------------------------------------------------------|-----|-----|-----|-----|-----|-----|-----|-----|-----|-----|-----|-----|------|------|
| The impact of COVID-19 home confinement on axial length in myopic children undergoing orthokeratology                                                    |     |     |     |     |     |     |     |     |     |     |     |     |      | Fair |
|                                                                                                                                                          |     |     |     |     |     |     |     |     |     |     |     |     |      | Poor |
| COVID-19 Quarantine Reveals That Behavioral Changes Have an Effect on Myopia Progression.<br>10.1016/j.optha.2021.04.001                                 | YES | NR  | YES | YES | CD  | YES | Good |      |
|                                                                                                                                                          |     |     |     |     |     |     |     |     |     |     |     |     | Fair |      |
|                                                                                                                                                          |     |     |     |     |     |     |     |     |     |     |     |     | Poor |      |
| Contribution of Total Screen/Online-Course Time to Asthenopia in Children During COVID-19 Pandemic via Influencing Psychological Stress                  | YES | Good |      |
|                                                                                                                                                          |     |     |     |     |     |     |     |     |     |     |     |     | Fair |      |
|                                                                                                                                                          |     |     |     |     |     |     |     |     |     |     |     |     | Poor |      |
| Prevalence of Self-Reported Symptoms of Computer Vision Syndrome and Associated Risk Factors among School Students in China during the COVID 19 Pandemic | YES |     | Good |      |
|                                                                                                                                                          |     |     |     |     |     |     |     |     |     |     |     |     | Fair |      |
|                                                                                                                                                          |     |     |     |     |     |     |     |     |     |     |     |     | Poor |      |

Interpretation: Good: 10 or more YES; Fair: 6 or more YES; Poor: 5 or less YES Abbreviations:

CD: Cannot Determine; NR: Not reported.

#### Risk of bias assessment of case series using the Murad MH et al. proposed tool.

| Article                                                                                                     | Selection  | Ascertainment |            |            | Causality  |            |            |            | Reporting |
|-------------------------------------------------------------------------------------------------------------|------------|---------------|------------|------------|------------|------------|------------|------------|-----------|
|                                                                                                             | Question 1 | Question 2    | Question 3 | Question 4 | Question 5 | Question 6 | Question 7 | Question 8 |           |
| Acute Acquired Concomitant Esotropia From Excessive Application of Near Vision During the COVID-19 Lockdown | YES        | YES           | YES        | YES        | NA         | NA         | NO         | YES        |           |

#### Risk of bias assessment of cohort studies using the NEWCASTLE - OTTAWA QUALITY ASSESSMENT SCALE

| Article                                                                                          | Selection                                                                                                     |                                                             |                                                                     |                                                                                     | Comparability                                                              | Outcome                                                                            |                                                                                                                                           |                                                                                                       | Overall  |
|--------------------------------------------------------------------------------------------------|---------------------------------------------------------------------------------------------------------------|-------------------------------------------------------------|---------------------------------------------------------------------|-------------------------------------------------------------------------------------|----------------------------------------------------------------------------|------------------------------------------------------------------------------------|-------------------------------------------------------------------------------------------------------------------------------------------|-------------------------------------------------------------------------------------------------------|----------|
|                                                                                                  | Question 1                                                                                                    | Question 2                                                  | Question 3                                                          | Question 4                                                                          | Question 1                                                                 | Question 1                                                                         | Question 2                                                                                                                                | Question 3                                                                                            |          |
| The Impact of Study-atHome During the COVID19 Pandemic on Myopia Progression in Chinese Children | 1 Star. Truly representative of the average primary schools in Fuxing District, Handan, Hebei, China children | 1 Star. Drawn from the same community as the exposed cohort | 1 Star. Secure record (eg medical records and clinical evaluations) | 0 Star.                                                                             | 1 Star. Study controls for not exposed to exposure factors (study at home) | 1 Star. Confirmation of the outcome by reference to secure records and self report | 1 Star. Yes: 6 months Assessment at baseline (July 2019), at the first follow-up (January 2020) and at the second follow-up (August 2020) | 0 Star. No statement                                                                                  | 6 Stars. |
| Rates of Myopia Development in Young Chinese Schoolchildren During the Outbreak of COVID-19      | 1 Star. somewhat representative of the average children in the community. (Especially, young school children) | 1 Star. Drawn from the same community as the exposed cohort | 1 Star. Secure record (eg medical records and clinical evaluations) | 1 Star. They described the percentages of patients without the outcome at baseline. | 1 Star. Study controls for grade.                                          | 1 Star. Confirmation of the outcome by reference to secure records.                | 1 Star. 3 measurements in 3 years.                                                                                                        | 1 Star. Subjects lost to follow up unlikely to introduce bias - small number lost - < 20 % follow up. | 7 Stars. |
